# Supplementary material
Source: publisher site journal article supplement (https://www.spandidos-publications.com/7856/downloadSupplementary)
Supplement: Supplementary file 1 [file downloadSupplementary]

## Sheet:  Table SI
Table SI. Detailed information on the 160 patients with PC from TCGA cohort.
id	futime	fustat	sex	age	grade	T	N	M	stage	site	primary_therapy_outcome_success	disease_type
TCGA-3A-A9IO-01A	1942	0	male	55	G1	TX	NX	MX	not reported	Body of pancreas		Adenomas and Adenocarcinomas
TCGA-US-A774-01A	695	1	female	76	G3	T3	N1	MX	stage IIB	Head of pancreas		Ductal and Lobular Neoplasms
TCGA-HZ-A49H-01A	491	0	female	68	G2	T3	N1	MX	stage IIB	Head of pancreas	Complete Remission/Response	Ductal and Lobular Neoplasms
TCGA-FB-A4P5-01A	179	1	female	69	G2	T3	N1	MX	stage IIB	Head of pancreas		Ductal and Lobular Neoplasms
TCGA-FB-AAPS-01A	228	0	female	62	G2	T2	N1	MX	stage IIB	Head of pancreas		Ductal and Lobular Neoplasms
TCGA-3A-A9IN-01A	2084	0	female	62	G2	T2	NX	MX	stage IB	Body of pancreas	Complete Remission/Response	Adenomas and Adenocarcinomas
TCGA-HV-A5A5-01A	289	0	female	61	G2	T3	N1	M0	stage IIB	Head of pancreas		Ductal and Lobular Neoplasms
TCGA-H6-8124-01A	392	0	female	56	G3	T3	N1	M0	stage IIB	Head of pancreas	Complete Remission/Response	Adenomas and Adenocarcinomas
TCGA-US-A77G-01A	12	1	male	64	G2	T3	N1	MX	stage IIB	Head of pancreas		Ductal and Lobular Neoplasms
TCGA-3A-A9IJ-01A	1854	0	male	65	G1	T2	N0	MX	stage IB	Head of pancreas	Complete Remission/Response	Adenomas and Adenocarcinomas
TCGA-HZ-A8P0-01A	0	0	male	76	G1	T3	N1	MX	stage IIB	Head of pancreas		Ductal and Lobular Neoplasms
TCGA-IB-7644-01A	394	1	female	65	G2	T3	N1	M1	stage IV	Head of pancreas	Progressive Disease	Ductal and Lobular Neoplasms
TCGA-IB-A7LX-01A	250	1	male	57	G2	T3	N1	MX	stage IIB	Head of pancreas		Ductal and Lobular Neoplasms
TCGA-2J-AABK-01A	484	0	male	71	G2	T3	N1	M0	stage IIB	Head of pancreas	Complete Remission/Response	Ductal and Lobular Neoplasms
TCGA-S4-A8RP-01A	702	1	female	77	G3	T3	N1	MX	stage IIB	Head of pancreas		Ductal and Lobular Neoplasms
TCGA-XD-AAUG-01A	420	0	female	66	G2	T3	N1	M1	stage IV	Body of pancreas		Ductal and Lobular Neoplasms
TCGA-M8-A5N4-01A	584	0	female	48	G2	T3	N0	M0	stage IIA	Head of pancreas		Ductal and Lobular Neoplasms
TCGA-2L-AAQI-01A	103	1	male	66	G3	T3	N1	MX	stage IIB	Head of pancreas	Progressive Disease	Ductal and Lobular Neoplasms
TCGA-HZ-7919-01A	593	1	female	52	G2	T3	N1	M0	stage IIB	Head of pancreas		Ductal and Lobular Neoplasms
TCGA-IB-AAUM-01A	8	0	male	76	G3	T2	N1	M0	stage IIB	Head of pancreas	Partial Remission/Response	Ductal and Lobular Neoplasms
TCGA-2J-AAB9-01A	627	1	female	70	G1	T3	N1	M0	stage IIB	Head of pancreas		Ductal and Lobular Neoplasms
TCGA-2L-AAQJ-01A	394	1	female	49	G2	T4	N0	MX	stage III	Head of pancreas	Progressive Disease	Ductal and Lobular Neoplasms
TCGA-IB-AAUU-01A	245	0	male	35	G3	T3	N1	M0	stage IIB	Head of pancreas	Complete Remission/Response	Ductal and Lobular Neoplasms
TCGA-Q3-A5QY-01A	416	0	male	58	G2	T3	N1	MX	stage IIB	Head of pancreas		Ductal and Lobular Neoplasms
TCGA-FB-AAQ1-01A	123	1	male	49	G2	T3	N1	MX	stage IIB	Head of pancreas	Stable Disease	Ductal and Lobular Neoplasms
TCGA-HV-A5A3-01A	128	1	male	50	G2	T3	NX	MX	stage IIA	Body of pancreas		Ductal and Lobular Neoplasms
TCGA-IB-AAUO-01A	239	1	female	64	G3	T3	N1	M0	stage IIB	Head of pancreas	Partial Remission/Response	Ductal and Lobular Neoplasms
TCGA-IB-8127-01A	522	0	male	59	G2	T3	N1	M0	stage IIB	Head of pancreas	Complete Remission/Response	Ductal and Lobular Neoplasms
TCGA-FB-A545-01A	732	1	female	72	G2	T3	N1	M0	stage IIB	Body of pancreas	Complete Remission/Response	Ductal and Lobular Neoplasms
TCGA-YH-A8SY-01A	388	0	female	73	G2	T3	N1	MX	not reported	Head of pancreas		Adenomas and Adenocarcinomas
TCGA-IB-A5SQ-01A	219	1	female	56	G2	T2	N0	M0	stage IB	Head of pancreas		Ductal and Lobular Neoplasms
TCGA-HV-A7OP-01A	978	0	male	72	GX	T3	N1	M0	stage IIB	Head of pancreas		Ductal and Lobular Neoplasms
TCGA-FB-AAQ6-01A	244	1	male	85	G2	T1	N0	MX	stage IA	Tail of pancreas	Progressive Disease	Ductal and Lobular Neoplasms
TCGA-FB-AAQ2-01A	153	1	female	81	G3	T3	N1	MX	stage IIB	Head of pancreas	Progressive Disease	Ductal and Lobular Neoplasms
TCGA-US-A77J-01A	568	1	female	81	G2	T3	N1b	MX	stage IIB	Head of pancreas		Ductal and Lobular Neoplasms
TCGA-3A-A9I9-01A	634	1	male	67	G2	T3	N0	MX	stage IIA	Head of pancreas		Ductal and Lobular Neoplasms
TCGA-IB-7654-01A	476	1	male	80	G2	T2	N1	M0	stage IIB	Head of pancreas		Ductal and Lobular Neoplasms
TCGA-IB-AAUW-01A	230	1	female	63	G3	T3	N1	M0	stage IIB	Head of pancreas	Complete Remission/Response	Ductal and Lobular Neoplasms
TCGA-FB-AAPZ-01A	716	0	male	54	G3	T2	N1	MX	stage IIB	Head of pancreas	Complete Remission/Response	Ductal and Lobular Neoplasms
TCGA-IB-AAUS-01A	225	0	female	84	G2	T3	N1	M0	stage IIB	Head of pancreas		Ductal and Lobular Neoplasms
TCGA-F2-6879-01A	334	1	male	57	G2	T3	N1	M0	stage IIB	Head of pancreas	Complete Remission/Response	Adenomas and Adenocarcinomas
TCGA-3A-A9IS-01A	998	0	male	67	G1	T2	N0	MX	stage IB	Body of pancreas		Adenomas and Adenocarcinomas
TCGA-L1-A7W4-01A	278	1	female	48	G3	T3	N1	M0	stage IIB	Head of pancreas	Progressive Disease	Ductal and Lobular Neoplasms
TCGA-FB-A7DR-01A	353	1	male	48	G2	T3	NX	M0	stage IIA	Head of pancreas	Complete Remission/Response	Cystic, Mucinous and Serous Neoplasms
TCGA-2J-AABO-01A	440	0	male	43	G2	T3	N1	M0	stage IIB	Head of pancreas	Progressive Disease	Ductal and Lobular Neoplasms
TCGA-3A-A9IH-01A	1021	0	female	66	G2	T1	N0	MX	stage IA	Body of pancreas		Ductal and Lobular Neoplasms
TCGA-PZ-A5RE-01A	470	1	female	44	G3	T3	N1	MX	stage IIB	Head of pancreas		Ductal and Lobular Neoplasms
TCGA-HZ-8003-01A	596	1	female	65	G2	T3	N1	MX	stage IIB	Head of pancreas	Complete Remission/Response	Ductal and Lobular Neoplasms
TCGA-3A-A9IB-01A	224	1	female	69	G3	T3	N1	MX	stage IIB	Head of pancreas		Ductal and Lobular Neoplasms
TCGA-H6-A45N-01A	421	1	female	88	G3	T3	N1	MX	stage IIB	Tail of pancreas	Progressive Disease	Adenomas and Adenocarcinomas
TCGA-HZ-8001-01A	706	0	male	69	G2	T4	N0	MX	stage III	Head of pancreas	Complete Remission/Response	Ductal and Lobular Neoplasms
TCGA-IB-A7M4-01A	483	0	male	81	G3	T3	N1	MX	stage IIB	Body of pancreas	Complete Remission/Response	Ductal and Lobular Neoplasms
TCGA-2J-AABP-01A	463	0	female	58	G4	T3	N1	M0	stage IIB	Tail of pancreas	Complete Remission/Response	Epithelial Neoplasms, NOS
TCGA-HZ-A77Q-01A	33	0	female	55	G2	T3	N1	MX	stage IIB	Head of pancreas		Adenomas and Adenocarcinomas
TCGA-HZ-7926-01A	518	1	male	57	G1	T3	N1	MX	stage IIB	Head of pancreas	Progressive Disease	Ductal and Lobular Neoplasms
TCGA-XN-A8T5-01A	720	0	female	53	G2	T2	N0	M0	stage IB	Head of pancreas	Progressive Disease	Ductal and Lobular Neoplasms
TCGA-IB-A5ST-01A	635	0	female	64	G2	T3	N1	M0	stage IIB	Head of pancreas	Complete Remission/Response	Ductal and Lobular Neoplasms
TCGA-FB-AAQ0-01A	473	1	male	68	G3	T3	N0	MX	stage IIA	Head of pancreas	Complete Remission/Response	Ductal and Lobular Neoplasms
TCGA-2J-AABH-01A	1287	0	male	61	G3	T3	N0	M0	stage IIA	Body of pancreas	Complete Remission/Response	Adenomas and Adenocarcinomas
TCGA-IB-AAUT-01A	287	0	male	65	G1	T2	N1	M0	stage IIB	Head of pancreas	Complete Remission/Response	Cystic, Mucinous and Serous Neoplasms
TCGA-HV-A5A4-01A	232	0	female	72	G2	T3	N0	MX	stage IIA	Tail of pancreas		Ductal and Lobular Neoplasms
TCGA-US-A779-01A	511	1	female	54	G1	T3	N1b	MX	stage IIB	Head of pancreas		Ductal and Lobular Neoplasms
TCGA-FB-AAPP-01A	485	1	male	71	G3	T3	N1	MX	stage IIB	Head of pancreas	Progressive Disease	Ductal and Lobular Neoplasms
TCGA-HV-A5A6-01A	2036	1	female	65	G1	T3	N1b	M0	stage IIB	Head of pancreas	Progressive Disease	Ductal and Lobular Neoplasms
TCGA-FB-A78T-01A	375	1	female	71	G2	T3	N1	M0	stage IIB	Head of pancreas	Complete Remission/Response	Ductal and Lobular Neoplasms
TCGA-IB-7646-01A	145	1	male	60	G2	T3	N1	M0	stage IIB	Head of pancreas	Partial Remission/Response	Ductal and Lobular Neoplasms
TCGA-RL-AAAS-01A	9	0	female	60	G2	T2	N0	M0	stage IB	Head of pancreas	Complete Remission/Response	Ductal and Lobular Neoplasms
TCGA-US-A77E-01A	430	1	male	73	G3	T3	N1	MX	stage IIB	Head of pancreas		Adenomas and Adenocarcinomas
TCGA-HZ-8636-01A	545	1	female	58	G3	T3	N0	M1	stage IV	Tail of pancreas	Progressive Disease	Ductal and Lobular Neoplasms
TCGA-IB-AAUP-01A	431	0	male	68	G2	T3	N1	M0	stage IIB	Head of pancreas	Complete Remission/Response	Ductal and Lobular Neoplasms
TCGA-IB-AAUR-01A	338	0	male	67	G1	T3	N1	M0	stage IIB	Head of pancreas	Partial Remission/Response	Ductal and Lobular Neoplasms
TCGA-F2-A8YN-01A	517	0	male	76	G2	T3	N0	M0	stage IIA	Head of pancreas	Progressive Disease	Ductal and Lobular Neoplasms
TCGA-3E-AAAZ-01A	2182	1	male	71	G2	T3	N0	MX	stage IIA	Head of pancreas		Ductal and Lobular Neoplasms
TCGA-HZ-8637-01A	517	1	female	76	G3	T3	N1	MX	stage IIB	Head of pancreas	Complete Remission/Response	Ductal and Lobular Neoplasms
TCGA-HZ-A4BH-01A	194	0	male	75	G3	T3	N1b	MX	stage IIB	Head of pancreas		Ductal and Lobular Neoplasms
TCGA-3A-A9I5-01A	1794	0	male	57	G1		N0	MX	not reported	Head of pancreas	Complete Remission/Response	Ductal and Lobular Neoplasms
TCGA-XD-AAUL-01A	498	0	male	56	G2	T3	N0	MX	stage IIA	Head of pancreas	Complete Remission/Response	Ductal and Lobular Neoplasms
TCGA-HZ-7923-01A	314	0	male	65	G2	T3	N0	MX	stage IIA	Head of pancreas	Complete Remission/Response	Ductal and Lobular Neoplasms
TCGA-2J-AABE-01A	676	0	male	73	G2	T3	N0	M0	stage IIA	Body of pancreas	Complete Remission/Response	Ductal and Lobular Neoplasms
TCGA-FB-AAPU-01A	381	1	female	41	G2	T3	N0	MX	stage IIA	Head of pancreas	Progressive Disease	Ductal and Lobular Neoplasms
TCGA-3A-A9IC-01A	738	1	female	61	G2	T3	N1	MX	stage IIB	Head of pancreas		Ductal and Lobular Neoplasms
TCGA-2J-AABI-01A	969	0	female	55	G3	T3	N0	M0	stage IIA	Head of pancreas	Progressive Disease	Adenomas and Adenocarcinomas
TCGA-HZ-A77O-01A	160	1	female	77	G2	T2	N1	MX	stage IIB	Head of pancreas	Complete Remission/Response	Ductal and Lobular Neoplasms
TCGA-YY-A8LH-01A	2016	0	female	61	G3	T3	N1	MX	stage IIB	Tail of pancreas	Complete Remission/Response	Ductal and Lobular Neoplasms
TCGA-3E-AAAY-01A	2285	0	male	67	G3	T3	N1	MX	stage IIB	Body of pancreas	Complete Remission/Response	Ductal and Lobular Neoplasms
TCGA-3A-A9IZ-01A	308	1	male	47	G2	T3	N1	MX	stage IIB	Head of pancreas		Ductal and Lobular Neoplasms
TCGA-IB-A6UG-01A	41	1	male	65	G3	T3	N1	M0	stage IIB	Head of pancreas	Partial Remission/Response	Ductal and Lobular Neoplasms
TCGA-FB-A5VM-01A	498	1	male	74	G3	T2	N0	M0	stage IB	Head of pancreas	Progressive Disease	Ductal and Lobular Neoplasms
TCGA-RB-AA9M-01A	286	0	male	43	G3	T1	N1	MX	stage IIB	Tail of pancreas	Progressive Disease	Ductal and Lobular Neoplasms
TCGA-HZ-A49G-01A	660	0	female	58	G2	T2	N1	MX	stage IIB	Head of pancreas	Progressive Disease	Ductal and Lobular Neoplasms
TCGA-HV-AA8X-01A	532	1	female	75	G2	T2	N1	MX	stage IIB	Body of pancreas	Stable Disease	Ductal and Lobular Neoplasms
TCGA-LB-A7SX-01A	393	1	female	74	G2	T3	N1	MX	stage IIB	Head of pancreas	Stable Disease	Ductal and Lobular Neoplasms
TCGA-HZ-7922-01A	4	0	female	61	G1	T3	N1	MX	stage IIB	Head of pancreas		Ductal and Lobular Neoplasms
TCGA-2J-AABV-01A	652	1	male	74	G4	T3	N1	M0	stage IIB	Head of pancreas	Progressive Disease	Ductal and Lobular Neoplasms
TCGA-IB-AAUN-01A	144	1	female	74	G2	T2	N0	M0	stage IB	Head of pancreas	Complete Remission/Response	Ductal and Lobular Neoplasms
TCGA-IB-A6UF-01A	666	0	male	63	G2	T3	N1	M0	stage IIB	Head of pancreas	Partial Remission/Response	Ductal and Lobular Neoplasms
TCGA-HV-A7OL-01A	252	0	male	70	G2	T3	N0	MX	stage IIA	Head of pancreas	Stable Disease	Ductal and Lobular Neoplasms
TCGA-IB-7651-01A	603	1	female	64	G2	T3	N1	M0	stage IIB	Head of pancreas	Complete Remission/Response	Ductal and Lobular Neoplasms
TCGA-2J-AABU-01A	277	1	male	56	G3	T3	N1	M0	stage IIB	Head of pancreas		Ductal and Lobular Neoplasms
TCGA-XN-A8T3-01A	951	0	male	67	G2	T2	N0	M0	stage IB	Head of pancreas	Progressive Disease	Ductal and Lobular Neoplasms
TCGA-HV-AA8V-01A	920	0	male	50	G3	T3	N1	MX	stage IIB	Head of pancreas		Ductal and Lobular Neoplasms
TCGA-S4-A8RO-01A	525	0	female	75	G2	T3	N1	MX	stage IIB	Head of pancreas	Complete Remission/Response	Ductal and Lobular Neoplasms
TCGA-IB-8126-01A	462	0	female	79	G1	T4	N1	M0	stage III	Head of pancreas		Ductal and Lobular Neoplasms
TCGA-2J-AABF-01A	691	1	male	73	G3	T3	N1	M0	stage IIB	Head of pancreas	Progressive Disease	Ductal and Lobular Neoplasms
TCGA-US-A776-01A	1216	0	male	61	G2	T3	N0	MX	stage IIA	Head of pancreas	Complete Remission/Response	Cystic, Mucinous and Serous Neoplasms
TCGA-2J-AABT-01A	319	0	female	72	G2	T3	N1	M0	stage IIB	Head of pancreas		Ductal and Lobular Neoplasms
TCGA-XD-AAUI-01A	366	1	female	50	G2	T3	N1	MX	stage IIB	Head of pancreas	Progressive Disease	Ductal and Lobular Neoplasms
TCGA-RB-A7B8-01A	466	1	female	81	G2	T3	N1	MX	stage IIB	Head of pancreas	Complete Remission/Response	Adenomas and Adenocarcinomas
TCGA-XD-AAUH-01A	395	0	female	57	G2	T3	N1	M0	stage IIB	Head of pancreas		Ductal and Lobular Neoplasms
TCGA-2J-AAB6-01A	293	1	male	75	G2	T3	N0	M0	stage IIA	Body of pancreas		Ductal and Lobular Neoplasms
TCGA-2J-AAB4-01A	729	0	male	48	G2	T2	N1	M0	stage IIB	Overlapping lesion of pancreas	Complete Remission/Response	Adenomas and Adenocarcinomas
TCGA-FB-A4P6-01A	767	0	male	54	G1	T3	N1	MX	stage IIB	Head of pancreas		Ductal and Lobular Neoplasms
TCGA-IB-AAUV-01A	404	0	male	49	G2	T3	N1	M0	stage IIB	Head of pancreas	Complete Remission/Response	Ductal and Lobular Neoplasms
TCGA-3A-A9IL-01A	2741	0	female	39	G1	T1		MX	stage I	Body of pancreas		Adenomas and Adenocarcinomas
TCGA-IB-AAUQ-01A	183	1	male	50	G2	T3	N1	M0	stage IIB	Tail of pancreas	Partial Remission/Response	Ductal and Lobular Neoplasms
TCGA-FB-AAPQ-01A	1130	1	male	65	G2	T3	N1	MX	stage IIB	Head of pancreas	Progressive Disease	Ductal and Lobular Neoplasms
TCGA-IB-A5SS-01A	460	1	female	64	G3	T3	N1	M0	stage IIB	Tail of pancreas	Complete Remission/Response	Ductal and Lobular Neoplasms
TCGA-IB-7645-01A	1502	1	female	44	G1	T3	N1	M0	stage IIB	Head of pancreas	Progressive Disease	Ductal and Lobular Neoplasms
TCGA-2J-AAB1-01A	66	1	male	65	G3	T3	N1	M0	stage IIB	Head of pancreas		Cystic, Mucinous and Serous Neoplasms
TCGA-IB-A5SP-01A	482	0	male	77	G2	T3	N0	M0	stage IIA	Head of pancreas		Ductal and Lobular Neoplasms
TCGA-OE-A75W-01A	267	1	male	75	G1	T3	N0	M0	stage IIA	Tail of pancreas	Progressive Disease	Ductal and Lobular Neoplasms
TCGA-3A-A9IX-01A	1037	0	male	40	G2	T1	N0	MX	stage IA	Head of pancreas	Complete Remission/Response	Ductal and Lobular Neoplasms
TCGA-3A-A9IV-01A	1103	0	female	59	G1	T2	N0	MX	stage IB	Tail of pancreas	Complete Remission/Response	Adenomas and Adenocarcinomas
TCGA-HZ-8315-01A	299	1	female	54	G2	T3	N0	MX	stage IIA	Head of pancreas		Ductal and Lobular Neoplasms
TCGA-Q3-AA2A-01A	95	0	female	64	G1	T3	N1	MX	stage IB	Head of pancreas		Ductal and Lobular Neoplasms
TCGA-HZ-7925-01A	614	1	male	66	G2	T3	N1	MX	stage IIB	Head of pancreas	Complete Remission/Response	Ductal and Lobular Neoplasms
TCGA-HZ-7289-01A	661	1	male	77	G1	T3	N1	MX	stage IIB	Head of pancreas		Adenomas and Adenocarcinomas
TCGA-HZ-8519-01A	454	0	male	73	G3	T1	N0	MX	stage IA	Head of pancreas	Complete Remission/Response	Adenomas and Adenocarcinomas
TCGA-F2-A44G-01A	233	1	female	79	G2	T3	N1	M0	stage IIB	Head of pancreas	Complete Remission/Response	Adenomas and Adenocarcinomas
TCGA-HZ-8638-01A	151	1	female	84	GX	T1	N0	MX	stage IA	Head of pancreas	Complete Remission/Response	Cystic, Mucinous and Serous Neoplasms
TCGA-3A-A9IU-01A	458	1	male	65	G3	T3	N1	MX	stage IIB	Head of pancreas		Ductal and Lobular Neoplasms
TCGA-2J-AABR-01A	438	0	female	60	G3	T3	N0	M0	stage IIA	Overlapping lesion of pancreas	Progressive Disease	Ductal and Lobular Neoplasms
TCGA-2J-AABA-01A	607	1	male	55	G2	T3	N1	M0	stage IIB	Head of pancreas	Progressive Disease	Ductal and Lobular Neoplasms
TCGA-F2-6880-01A	295	0	male	70	G1	T3	N1	M0	stage IIB	Head of pancreas		Adenomas and Adenocarcinomas
TCGA-F2-A7TX-01A	95	1	male	77	G3	T3	N1	M0	stage IIB	Head of pancreas		Ductal and Lobular Neoplasms
TCGA-HZ-A4BK-01A	657	0	male	72	G3	T3	N1	MX	stage IIB	Head of pancreas	Progressive Disease	Adenomas and Adenocarcinomas
TCGA-HZ-A77P-01A	330	0	male	77	G1	T3	N1	MX	stage IIB	Head of pancreas	Complete Remission/Response	Adenomas and Adenocarcinomas
TCGA-3A-A9J0-01A	743	0	male	75	G2	T3	N1	MX	stage IIB	Head of pancreas		Ductal and Lobular Neoplasms
TCGA-HZ-A8P1-01A	7	0	male	81	G1	T2	N0	MX	stage IB	Tail of pancreas		Ductal and Lobular Neoplasms
TCGA-2L-AAQL-01A	292	1	male	82	G3	T3	N1	MX	stage IIB	Head of pancreas	Progressive Disease	Ductal and Lobular Neoplasms
TCGA-HZ-8317-01A	378	1	female	69	G1	T3	N1	MX	stage IIB	Head of pancreas	Progressive Disease	Ductal and Lobular Neoplasms
TCGA-HZ-7920-01A	236	1	male	71	G2	T2	N0	MX	stage IB	Head of pancreas	Complete Remission/Response	Ductal and Lobular Neoplasms
TCGA-HZ-A49I-01A	308	1	male	77	G2	T3	N1	MX	stage IIB	Head of pancreas	Progressive Disease	Ductal and Lobular Neoplasms
TCGA-HZ-A9TJ-01A	603	0	male	70	G2	T3	N0	M1	stage IV	Tail of pancreas		Adenomas and Adenocarcinomas
TCGA-YB-A89D-01A	350	0	male	59	G2	T3	N1	MX	stage IIB	Body of pancreas	Complete Remission/Response	Ductal and Lobular Neoplasms
TCGA-IB-7649-01A	467	1	female	73	G2	T3	N1	M0	stage IIB	Head of pancreas	Partial Remission/Response	Ductal and Lobular Neoplasms
TCGA-LB-A8F3-01A	379	0	female	64	G1	T3	N0	MX	stage IIA	Head of pancreas		Ductal and Lobular Neoplasms
TCGA-2J-AAB8-01A	80	0	male	71	G3	T3	N1	M0	stage IIB	Head of pancreas		Ductal and Lobular Neoplasms
TCGA-3A-A9IR-01A	1542	0	female	64	G1	T2	N0	MX	stage IB	Tail of pancreas	Complete Remission/Response	Adenomas and Adenocarcinomas
TCGA-2L-AAQE-01A	684	1	male	56	G2	T3	N1	M0	stage IIB	Head of pancreas	Progressive Disease	Ductal and Lobular Neoplasms
TCGA-3A-A9I7-01A	1323	0	male	45	G2	T3	N1	MX	stage IIB	Head of pancreas		Ductal and Lobular Neoplasms
TCGA-LB-A9Q5-01A	313	1	female	63	G3	T3	N1	MX	stage IIB	Head of pancreas		Ductal and Lobular Neoplasms
TCGA-HZ-7924-01A	840	0	female	60	G2	T3	N0	MX	stage IIA	Head of pancreas	Complete Remission/Response	Ductal and Lobular Neoplasms
TCGA-HZ-8002-01A	366	1	male	61	G2	T3	N1	MX	stage IIB	Head of pancreas		Ductal and Lobular Neoplasms
TCGA-FB-AAPY-01A	1059	1	male	71	G2	T2	N1	MX	stage IIB	Head of pancreas	Complete Remission/Response	Ductal and Lobular Neoplasms
TCGA-F2-A44H-01A	586	0	male	65	G2	T3	N0	M0	stage IIA	Head of pancreas	Complete Remission/Response	Adenomas and Adenocarcinomas
TCGA-IB-A5SO-01A	365	1	male	71	G2	T3	N1	M0	stage IIB	Head of pancreas	Progressive Disease	Ductal and Lobular Neoplasms
TCGA-FB-AAQ3-01A	31	1	female	65	G2	T3	N1	MX	stage IIB	Head of pancreas		Ductal and Lobular Neoplasms
TCGA-HZ-7918-01A	969	0	male	72	G3	T3	N1	M0	stage IIB	Head of pancreas	Complete Remission/Response	Ductal and Lobular Neoplasms
TCGA-H8-A6C1-01A	671	0	male	53	G2	T3	N0	MX	stage IIA	Head of pancreas	Complete Remission/Response	Adenomas and Adenocarcinomas

## Sheet: Table SII
Table SII. GSEA of the cuproptosis subtypes in TCGA cohort.
id	Cluster	TP53 mut	KRAS mut	Fustat	Gender	Age	Stage	KEGG_OLFACTORY_TRANSDUCTION	KEGG_WNT_SIGNALING_PATHWAY	KEGG_PANCREATIC_CANCER	KEGG_AXON_GUIDANCE	KEGG_PATHWAYS_IN_CANCER	KEGG_PATHOGENIC_ESCHERICHIA_COLI_INFECTION	KEGG_REGULATION_OF_ACTIN_CYTOSKELETON	KEGG_ADHERENS_JUNCTION	KEGG_HEDGEHOG_SIGNALING_PATHWAY	KEGG_SMALL_CELL_LUNG_CANCER	KEGG_COLORECTAL_CANCER	KEGG_THYROID_CANCER	KEGG_ENDOCYTOSIS	KEGG_BLADDER_CANCER	KEGG_P53_SIGNALING_PATHWAY	KEGG_FOCAL_ADHESION	KEGG_CHRONIC_MYELOID_LEUKEMIA	KEGG_TIGHT_JUNCTION	KEGG_PROSTATE_CANCER	KEGG_RENAL_CELL_CARCINOMA	KEGG_MELANOMA	KEGG_TGF_BETA_SIGNALING_PATHWAY	KEGG_UBIQUITIN_MEDIATED_PROTEOLYSIS	KEGG_PROGESTERONE_MEDIATED_OOCYTE_MATURATION	KEGG_OOCYTE_MEIOSIS	KEGG_ARRHYTHMOGENIC_RIGHT_VENTRICULAR_CARDIOMYOPATHY_ARVC	KEGG_BASAL_CELL_CARCINOMA	KEGG_INSULIN_SIGNALING_PATHWAY	KEGG_GLIOMA	KEGG_ENDOMETRIAL_CANCER	KEGG_ERBB_SIGNALING_PATHWAY	KEGG_ECM_RECEPTOR_INTERACTION	KEGG_VEGF_SIGNALING_PATHWAY	KEGG_NEUROTROPHIN_SIGNALING_PATHWAY	KEGG_CELL_CYCLE	KEGG_HYPERTROPHIC_CARDIOMYOPATHY_HCM	KEGG_MELANOGENESIS	KEGG_GLYCOSAMINOGLYCAN_BIOSYNTHESIS_KERATAN_SULFATE	KEGG_APOPTOSIS	KEGG_NON_SMALL_CELL_LUNG_CANCER	KEGG_EPITHELIAL_CELL_SIGNALING_IN_HELICOBACTER_PYLORI_INFECTION	KEGG_GLYCOSAMINOGLYCAN_BIOSYNTHESIS_HEPARAN_SULFATE
TCGA-2J-AAB1-01A	CGclusterA	Normal	Abnormal	Dead	Male	>=65	II	0.0355807	0.0961771	0.0852057	-0.0343318	0.10199	-0.0543206	0.0739832	0.202407	-0.0501796	-0.0658513	0.272275	0.166699	0.244552	-0.00500449	0.0414832	-0.113539	0.0115069	0.162582	0.0807803	-0.125069	-0.0341032	-0.0123843	-0.230589	-0.200241	-0.142988	0.0723809	0.218179	-0.0736611	-0.0987096	0.210269	0.00813703	-0.163119	-0.267086	0.0150895	-0.0906266	0.0375553	0.0925398	0.0980033	0.118699	-0.0905378	-0.0556537	-0.283071
TCGA-2J-AAB4-01A	CGclusterB	Abnormal	Abnormal	Live	Male	<65	II	0.118508	-0.225904	0.117891	0.0871056	0.0602348	0.040682	-0.0497911	0.0279603	-0.268567	0.118882	-0.0677024	-0.0125715	0.133392	0.0506048	0.203836	-0.123682	-0.226827	0.213191	0.110337	0.00897764	-0.168064	-0.261327	-0.223795	0.0316893	0.0842212	-0.0665538	-0.302609	-0.184066	-0.211237	-0.221726	-0.028572	-0.134244	-0.0724025	-0.10968	0.0701385	-0.179134	-0.156467	0.160875	0.25992	-0.0286389	0.105322	0.218978
TCGA-2J-AAB6-01A	CGclusterB	Abnormal	Abnormal	Dead	Male	>=65	II	0.152057	-0.0623197	0.295325	0.174001	0.0549517	0.00912402	0.139545	0.128991	-0.0953571	0.217526	0.0677039	0.164612	0.101346	0.195218	0.0402871	0.280099	0.120708	0.0721292	0.0998067	0.172189	0.19554	-0.062035	0.0936857	0.249493	0.18941	0.283282	-0.0327635	0.142377	0.217209	0.0763271	0.0918005	0.318504	0.101404	0.136464	0.311584	0.272706	-0.0897554	-0.0178665	-0.0925194	0.16481	-0.0174492	0.221821
TCGA-2J-AAB8-01A	CGclusterB	Abnormal	Normal	Live	Male	>=65	II	0.0658005	0.012477	0.0384475	-0.135474	0.0421658	0.0824744	0.136589	0.0706532	0.0495248	-0.0564712	-0.157785	0.0196696	-0.0708481	0.0186644	0.158575	0.0636009	-0.186582	0.196081	0.0101839	-0.364527	0.11945	0.273985	-0.0113278	-0.0705443	0.0682653	0.125187	0.189736	-0.26409	0.0994596	-0.28125	-0.167348	0.27916	-0.0379733	-0.231795	0.206558	0.232361	0.0424741	0.167535	-0.33105	-0.235607	-0.0893807	-0.0132789
TCGA-2J-AAB9-01A	CGclusterB	Normal	Normal	Dead	Female	>=65	II	0.209555	0.355028	0.211149	0.328581	0.33141	0.336918	0.390634	0.348093	0.402285	0.190337	0.202375	0.331472	0.324452	0.151226	0.0048769	0.43846	0.213494	0.40666	0.278236	0.261304	0.295533	0.486272	0.153823	0.15312	0.226858	0.480728	0.430643	0.25306	0.20353	0.311017	0.341682	0.540569	0.0749941	0.281215	0.0389117	0.346139	0.334323	0.309327	0.184099	0.1509	0.19772	0.189326
TCGA-2J-AABA-01A	CGclusterA	Normal	Normal	Dead	Male	<65	II	0.0850658	0.0997548	-0.151681	0.0479198	0.0875979	-0.281939	-0.0153604	0.00815527	0.366534	-0.148526	0.0619819	-0.00569526	-0.0430441	-0.0826856	0.167984	0.0607794	0.00466237	0.0921381	-0.0427041	-0.123264	0.0527146	0.414219	-0.0421915	-0.148289	-0.162149	0.0266607	0.375117	-0.133924	-0.131191	0.0147894	0.018287	0.0735471	-0.0457533	0.00988596	-0.193736	0.201664	0.044598	0.291868	0.111215	-0.161063	0.0462966	0.0702811
TCGA-2J-AABE-01A	CGclusterB	Normal	Abnormal	Live	Male	>=65	II	-0.00671864	0.0661623	-0.137052	0.177348	0.0247562	0.176744	0.0215605	0.0974836	0.285578	-0.0520477	0.0216951	-0.000519295	0.13253	-0.093881	0.183393	0.060449	-0.0652693	-0.0326262	-0.071515	-0.192681	-0.120568	-0.0215353	-0.190385	-0.330054	-0.376689	0.108793	0.358618	-0.17254	-0.144608	-0.0192353	-0.240775	0.323436	0.145115	-0.168164	-0.39113	0.010085	0.16215	0.390315	0.0335085	-0.278258	-0.0681836	0.0813142
TCGA-2J-AABF-01A	CGclusterA	Abnormal	Normal	Dead	Male	>=65	II	0.186843	-0.169563	0.145762	0.114577	0.119478	0.45295	0.148113	0.215065	-0.290366	0.381084	-0.0545182	0.0347651	0.0818337	0.0504445	0.030699	0.237155	0.0988239	0.219937	0.199374	0.0739227	-0.0625617	-0.0906169	-0.0196632	0.0923511	0.0780818	0.136841	-0.221767	0.0260884	0.0942094	0.0677735	-0.0210248	0.346719	0.0123033	0.12891	0.151411	0.0756417	-0.0286236	-0.509514	0.321735	0.280237	0.260769	-0.359438
TCGA-2J-AABH-01A	CGclusterA	Abnormal	Abnormal	Live	Male	<65	II	0.0532283	-0.290414	-0.0281382	-0.0755634	-0.142578	-0.0874879	-0.0518539	0.0616218	-0.322962	0.0561625	-0.170819	-0.0194493	0.0803646	-0.127965	-0.314887	-0.104051	-0.0882059	0.181889	-0.151441	-0.208497	-0.213133	-0.336029	-0.133754	-0.132484	-0.183534	-0.131473	-0.422048	-0.0622386	-0.146847	-0.0202743	0.0891159	-0.0855721	-0.212711	-0.241427	-0.361543	-0.107812	-0.368027	0.295247	-0.0367714	-0.014356	0.00785307	-0.103237
TCGA-2J-AABI-01A	CGclusterA	Abnormal	Abnormal	Live	Female	<65	II	0.0456678	-0.206591	0.0390484	-0.159027	-0.128043	-0.269904	-0.248154	-0.18673	-0.0349868	0.0170917	-0.122879	-0.180322	-0.185086	-0.0341955	-0.0623441	-0.229806	-0.171095	-0.263088	-0.155961	-0.207568	-0.224263	-0.436044	-0.0132875	-0.0922773	-0.224244	-0.304074	0.00085533	-0.14133	-0.123326	-0.150576	-0.104532	-0.254688	-0.179128	-0.230771	0.25035	-0.37104	-0.315516	-0.342054	-0.0372918	-0.107982	-0.0877252	-0.291535
TCGA-2J-AABK-01A	CGclusterA	Normal	Normal	Live	Male	>=65	II	0.155621	-0.311159	-0.327998	-0.300686	-0.351756	-0.252962	-0.359116	-0.363248	-0.444348	-0.392147	-0.381296	-0.0672467	-0.277699	-0.24371	0.0519718	-0.484099	-0.227942	-0.162195	-0.261753	-0.247352	-0.3628	-0.40289	-0.0585736	-0.120621	0.118085	-0.434521	-0.508222	-0.121904	-0.240385	-0.450276	-0.182887	-0.564141	-0.252724	-0.258469	-0.073653	-0.324851	-0.271102	-0.15927	-0.0736737	-0.237864	-0.0219701	-0.472771
TCGA-2J-AABO-01A	CGclusterA	Abnormal	Abnormal	Live	Male	<65	II	0.160816	0.209296	0.0253234	0.205377	0.156082	0.270221	0.185682	0.193759	0.379332	0.213146	-0.12955	0.0337773	-0.0412238	-0.166299	-0.00811802	0.325926	-0.0438462	0.242747	0.120353	-0.0997096	0.0973937	0.256361	-0.0131324	-0.155327	-0.0705032	0.427312	0.244763	-0.0871276	0.123254	0.0469783	-0.0260997	0.421557	-0.013327	-0.109362	-0.154899	0.362207	0.116749	0.0753312	-0.0365401	-0.123055	-0.201747	0.230033
TCGA-2J-AABP-01A	CGclusterA	Abnormal	Normal	Live	Female	<65	II	0.114277	-0.122804	0.205527	-0.214136	-0.00961776	-0.0895607	-0.044528	-0.211619	-0.211703	0.0510117	0.161586	-0.196788	-0.141574	0.16763	-0.0703222	0.0142512	0.0647814	-0.2915	-0.0527472	0.0277983	0.0341097	-0.319366	-0.00233584	0.253886	0.107281	-0.14345	-0.199114	-0.0660758	0.156515	-0.0976907	-0.166765	-0.088431	-0.0621648	0.0698894	0.332788	-0.0109555	-0.083689	0.121711	0.0199033	0.0877409	0.102523	0.33666
TCGA-2J-AABT-01A	CGclusterA	Abnormal	Abnormal	Live	Female	>=65	II	0.222361	0.221163	0.0262082	0.103304	0.161007	0.122171	0.225401	0.133221	0.211939	0.126229	0.16143	-0.0923083	0.151044	-0.202865	-0.363441	0.185715	0.191483	0.138171	0.147015	0.233262	0.0887091	0.0947782	0.0275045	0.0850672	0.0846878	0.395859	0.314024	0.381703	0.204069	0.315288	0.123979	0.216604	0.116114	0.367932	-0.333127	0.377138	0.399606	-0.292943	0.0593668	0.153727	0.200606	-0.253677
TCGA-2J-AABV-01A	CGclusterA	Normal	Normal	Dead	Male	>=65	II	0.0992091	-0.299297	-0.435678	-0.455189	-0.402414	-0.510781	-0.475463	-0.5308	-0.450296	-0.451845	-0.390054	-0.370394	-0.305821	-0.210416	-0.207613	-0.507224	-0.457982	-0.296765	-0.357083	-0.519499	-0.24711	-0.436718	-0.328478	-0.229245	-0.30149	-0.503638	-0.395371	-0.290155	-0.42507	-0.402844	-0.389838	-0.503324	-0.206917	-0.444907	-0.216034	-0.384944	-0.382351	-0.12723	-0.308816	-0.389097	-0.404686	-0.0403859
TCGA-2L-AAQE-01A	CGclusterB	Abnormal	Abnormal	Dead	Male	<65	II	-0.00240026	0.149494	0.137442	0.0655046	0.080998	0.0889567	0.0169795	-0.140131	0.305571	0.116838	0.210766	0.0558758	0.0240499	-0.0736152	0.0953065	-0.0532517	0.0392756	0.104489	0.0217678	-0.103519	0.0674318	-0.176947	0.181218	0.0270052	0.0537141	-0.151233	0.404603	0.119374	0.0130927	0.264925	-0.056572	-0.17233	0.0604777	0.0690788	0.0464594	-0.0581279	0.0773458	-0.221982	0.158637	0.216054	0.00677291	0.202843
TCGA-2L-AAQI-01A	CGclusterB	Abnormal	Abnormal	Dead	Male	>=65	II	0.172448	-0.0111513	-0.0195884	0.111494	-0.0363608	0.0493208	-0.0270852	0.0195835	0.0518256	-0.0510295	-0.111701	0.105407	0.0415415	-0.00384904	0.0169991	-0.146333	-0.209864	0.0945259	-0.0402868	0.0765623	-0.0622057	-0.0122177	-0.0486208	-0.0445294	0.132734	0.065392	-0.0983326	-0.0875956	-0.0982605	0.00637733	0.041515	-0.0445666	-0.234125	-0.122692	0.044002	-0.000495273	-0.0332865	-0.0704353	-0.0694801	0.0160706	-0.0232768	-0.190402
TCGA-2L-AAQJ-01A	CGclusterB	Abnormal	Abnormal	Dead	Female	<65	III	0.0225508	0.0840951	0.161851	0.238097	0.00366511	0.184057	0.100526	0.320142	-0.123564	-0.0320591	0.0698877	0.0643656	0.122191	0.230477	0.187439	-0.0194405	0.15636	0.278189	-0.0807763	0.0741789	-0.00489562	-0.247425	-0.0141848	-0.0388956	-0.0019186	0.106528	-0.192648	0.0947081	0.125454	0.137104	0.121985	-0.236638	0.172204	0.175949	0.0292617	0.150441	-0.142804	0.361155	0.136132	0.0914397	0.341239	-0.0573441
TCGA-2L-AAQL-01A	CGclusterA	Abnormal	Abnormal	Dead	Male	>=65	II	0.00528276	-0.180679	-0.325679	-0.0897856	-0.255002	-0.0307279	-0.180093	-0.339414	-0.119209	-0.448576	-0.395719	-0.214479	-0.160543	-0.10593	-0.21736	-0.336104	-0.395111	0.0989876	-0.333202	-0.382886	-0.122094	-0.300972	-0.253633	-0.216523	-0.288683	-0.148396	-0.0604223	-0.312417	-0.370327	-0.390046	-0.394363	-0.336942	-0.129958	-0.315481	-0.253075	-0.0315809	-0.191387	0.0356172	-0.266336	-0.2632	-0.326031	-0.198504
TCGA-3A-A9I5-01A	CGclusterA	Normal	Normal	Live	Male	<65	NA	0.0202552	-0.295045	-0.499606	-0.321855	-0.419141	-0.342885	-0.38908	-0.451737	-0.340768	-0.437114	-0.543562	-0.41972	-0.356	-0.242282	-0.109903	-0.44664	-0.422803	-0.229872	-0.439583	-0.36061	-0.369034	-0.37367	-0.29281	-0.293075	-0.273136	-0.400867	-0.409549	-0.304931	-0.369412	-0.587305	-0.390283	-0.451172	-0.270575	-0.469508	-0.131451	-0.359833	-0.389311	-0.339829	-0.388256	-0.43327	-0.177585	-0.0307414
TCGA-3A-A9I7-01A	CGclusterB	Normal	Normal	Live	Male	<65	II	0.192678	0.184454	0.00692249	0.0419367	0.1102	0.340764	0.281092	0.216985	0.192177	-0.0266739	0.00448885	0.242177	0.172218	0.0877352	-0.0369462	0.284775	0.214125	0.0804233	0.142565	-0.0173033	0.218735	0.174115	-0.287805	-0.198118	-0.198506	0.382843	0.441762	0.0899787	0.304339	0.224914	0.094016	0.329504	0.13807	0.233226	-0.237462	0.238094	0.295431	-0.172651	0.0137094	0.186945	-0.0518946	0.0868551
TCGA-3A-A9I9-01A	CGclusterA	Abnormal	Abnormal	Dead	Male	>=65	II	0.149082	-0.268525	-0.38316	-0.206994	-0.344949	-0.210409	-0.28621	-0.393684	-0.289191	-0.366734	-0.392358	-0.365966	-0.181895	-0.336021	-0.27419	-0.358851	-0.435888	-0.256534	-0.26492	-0.391144	-0.181534	-0.323574	-0.351102	-0.413027	-0.390857	-0.352584	-0.128853	-0.220299	-0.313266	-0.337412	-0.349614	-0.315594	-0.207025	-0.272061	-0.450191	-0.251204	-0.155101	-0.237539	-0.228619	-0.282848	-0.183579	-0.102184
TCGA-3A-A9IB-01A	CGclusterB	Abnormal	Abnormal	Dead	Female	>=65	II	-0.013312	0.140985	0.319129	0.290505	0.208903	0.243133	0.276101	0.192758	0.225145	0.237493	0.244282	-0.00452908	-0.000565533	0.334366	0.108883	0.418288	0.291466	0.0383142	0.191631	0.347105	0.379907	0.224059	0.0876095	0.326819	0.202328	0.340156	0.225308	0.113322	0.370585	0.39791	0.291874	0.490842	0.182143	0.216861	0.182772	0.290264	0.166258	0.430655	-0.0341986	0.24011	0.0274323	0.337787
TCGA-3A-A9IC-01A	CGclusterB	Abnormal	Abnormal	Dead	Female	<65	II	0.14845	-0.0134672	-0.0608451	0.0806311	0.0428157	-0.0635734	-0.00632324	-0.00206793	0.0748446	-0.0949715	-0.0971935	-0.211978	0.00717548	-0.0981634	0.0349179	0.0738513	-0.169405	-0.0483202	-0.0518152	-0.16033	0.0306877	-0.0658246	-0.197564	-0.00732348	-0.0354121	0.0990445	0.293289	-0.153742	-0.152999	-0.273389	-0.20987	0.277892	-0.00631508	-0.142766	0.0133929	-0.0246336	0.190901	0.359486	-0.259023	-0.28207	-0.121121	0.557029
TCGA-3A-A9IH-01A	CGclusterB	Abnormal	Abnormal	Live	Female	>=65	I	0.142935	0.0915331	0.144481	0.235908	0.0572902	0.2079	-0.0093909	0.138823	0.264923	-0.013567	0.101489	0.315947	0.00992825	-0.0818752	0.093118	-0.0373635	-0.0887252	0.175717	-0.0191946	-0.0333471	-0.0298298	-0.0889199	0.208483	0.0965183	0.162872	0.138416	0.0770049	0.0169053	-0.137378	0.0541639	-0.0266107	-0.109074	-0.0655	-0.0777822	0.165836	0.080057	0.0389586	0.113481	0.0453757	-0.0438441	0.0794404	-0.141905
TCGA-3A-A9IJ-01A	CGclusterA	Normal	Normal	Live	Male	>=65	I	0.139762	-0.1519	-0.560159	-0.315025	-0.502906	-0.512723	-0.461302	-0.498759	-0.325961	-0.545621	-0.398383	-0.407448	-0.322483	-0.574695	-0.453305	-0.517649	-0.511803	-0.385991	-0.495001	-0.39758	-0.449372	-0.466292	-0.114904	-0.169179	-0.0930172	-0.304925	-0.488283	-0.244414	-0.333529	-0.429817	-0.281922	-0.602392	-0.333355	-0.330273	-0.439655	-0.262836	-0.22121	-0.198914	-0.507383	-0.456667	-0.0763389	-0.0361995
TCGA-3A-A9IL-01A	CGclusterA	Normal	Normal	Live	Female	<65	I	0.128873	-0.412849	-0.550734	-0.425972	-0.439385	-0.625426	-0.386951	-0.402262	-0.191654	-0.461929	-0.486313	-0.548795	-0.305191	-0.44789	-0.530018	-0.390476	-0.421206	-0.424912	-0.487198	-0.357274	-0.274166	-0.492195	-0.212282	-0.151728	-0.329972	-0.235003	-0.32265	-0.24804	-0.363611	-0.461841	-0.335763	-0.409982	-0.402683	-0.363369	-0.51652	-0.163521	-0.272621	-0.463214	-0.530461	-0.414199	-0.234188	0.0705939
TCGA-3A-A9IN-01A	CGclusterA	Normal	Normal	Live	Female	<65	I	0.205539	-0.206757	-0.451368	-0.330087	-0.350869	-0.492991	-0.338776	-0.449822	0.0113775	-0.406405	-0.290204	-0.36491	-0.274438	-0.297782	-0.460521	-0.309853	-0.403141	-0.326418	-0.469208	-0.306271	-0.301176	-0.27229	-0.312998	-0.121142	-0.342414	-0.11453	-0.166606	-0.0748874	-0.312127	-0.372397	-0.246247	-0.396556	-0.263269	-0.254931	-0.491292	0.00345926	-0.0556041	-0.489556	-0.480764	-0.384923	-0.332724	-0.0762768
TCGA-3A-A9IO-01A	CGclusterA	Normal	Normal	Live	Male	<65	NA	0.11319	-0.279196	-0.493433	-0.446824	-0.459825	-0.613007	-0.398315	-0.428652	-0.330492	-0.5471	-0.476616	-0.411182	-0.222403	-0.376634	-0.44538	-0.466537	-0.462606	-0.364768	-0.489198	-0.330864	-0.436048	-0.365041	0.0446038	-0.0691318	-0.0738609	-0.391481	-0.509521	-0.185042	-0.414409	-0.467328	-0.274801	-0.563501	-0.353285	-0.314936	-0.40201	-0.338001	-0.275581	-0.511303	-0.468196	-0.397816	-0.0188576	0.0754147
TCGA-3A-A9IR-01A	CGclusterA	Normal	Normal	Live	Female	<65	I	0.151581	-0.243451	-0.524138	-0.279215	-0.491945	-0.502166	-0.436856	-0.389332	-0.406747	-0.571316	-0.391123	-0.391222	-0.254127	-0.490137	-0.450892	-0.516191	-0.404416	-0.438369	-0.447023	-0.294248	-0.387029	-0.466272	0.0350614	-0.224943	-0.142282	-0.342659	-0.516866	-0.101115	-0.318455	-0.341102	-0.312025	-0.595343	-0.275955	-0.228657	-0.399075	-0.422719	-0.24718	-0.464086	-0.521767	-0.458091	-0.234993	-0.215212
TCGA-3A-A9IS-01A	CGclusterA	Normal	Normal	Live	Male	>=65	I	-0.0638186	-0.168129	-0.504199	-0.370908	-0.406827	-0.608167	-0.417622	-0.358676	-0.160555	-0.533944	-0.310277	-0.48902	-0.254231	-0.400259	-0.376564	-0.489092	-0.389726	-0.40752	-0.474221	-0.294029	-0.444302	-0.390137	0.0492013	0.0162068	0.01044	-0.342631	-0.417862	-0.164119	-0.408823	-0.448073	-0.233858	-0.601859	-0.360652	-0.243065	-0.0890849	-0.315228	-0.232822	-0.548644	-0.497052	-0.437578	-0.120484	0.0325929
TCGA-3A-A9IU-01A	CGclusterB	Abnormal	Abnormal	Dead	Male	>=65	II	0.0290156	-0.101649	-0.0167331	0.0587767	-0.0277006	-0.0323359	-0.0369711	0.133111	-0.301364	0.00921806	-0.228246	0.0439324	-0.0360368	0.144967	-0.0368751	0.0326373	-0.0834144	0.184865	-0.0563107	0.0699825	0.0646679	0.083771	0.189369	-0.098368	-0.176887	-0.089308	-0.236292	-0.125141	-0.0792806	-0.0262948	-0.00145296	0.0155243	-0.024058	-0.116366	-0.137601	-0.0852436	-0.182848	-0.131882	-0.102098	0.039454	0.00229616	-0.15766
TCGA-3A-A9IV-01A	CGclusterA	Normal	Normal	Live	Female	<65	I	0.241211	-0.201618	-0.340336	-0.273047	-0.403232	-0.547294	-0.33973	-0.406835	-0.192632	-0.448419	-0.225327	-0.431946	-0.295804	-0.361132	-0.269784	-0.387941	-0.315649	-0.434404	-0.439316	-0.286651	-0.300038	-0.281699	-0.0350657	0.05931	0.0201082	-0.258553	-0.448535	-0.0725248	-0.293953	-0.384999	-0.261682	-0.325484	-0.37322	-0.19457	-0.0610786	-0.165006	-0.223656	-0.629545	-0.505623	-0.327117	-0.262969	0.133977
TCGA-3A-A9IX-01A	CGclusterB	Normal	Normal	Live	Male	<65	I	0.185765	0.239099	0.20724	0.110522	0.267362	0.129969	0.180673	0.14912	0.306284	0.196845	0.115176	0.0660408	0.0708015	0.101019	-0.257389	0.282955	0.242098	0.0695866	0.219937	0.234371	0.25789	0.380254	-0.0806781	-0.152686	-0.0976332	0.0629687	0.298275	-0.0241141	0.243007	0.150403	0.185406	0.334167	0.051186	0.192855	-0.243459	0.131879	0.251179	0.20102	0.188966	0.208878	0.251465	0.0128825
TCGA-3A-A9IZ-01A	CGclusterB	Abnormal	Abnormal	Dead	Male	<65	II	0.120613	-0.0865584	0.0131942	-0.147025	0.0210541	-0.102364	-0.0733234	0.131267	-0.23898	0.08626	-0.101208	-0.187273	-0.142361	0.1182	0.200995	-0.0240891	-0.120688	0.0488891	-0.09565	-0.00326227	0.0224851	-0.15713	0.0262743	0.0258402	0.0856119	0.0349817	-0.224774	-0.0865451	-0.218429	-0.368889	-0.108135	0.248314	0.0203974	-0.203914	0.233661	0.0930433	-0.174321	-0.0714933	-0.137834	-0.29292	-0.0453655	0.00816845
TCGA-3A-A9J0-01A	CGclusterB	Abnormal	Normal	Live	Male	>=65	II	-0.0437814	0.0773501	-0.0297692	-0.0804198	0.0190831	-0.0473766	-0.001433	0.179747	0.21014	-0.0475127	0.0256025	-0.0373183	-0.114403	0.0733938	0.0231231	0.0211987	-0.0632024	0.104426	0.0379072	-0.0636778	0.00154849	0.0906932	-0.182549	-0.00716738	-0.0318408	0.00215555	0.210439	-0.125042	0.157614	0.0548287	-0.212281	0.060174	0.0476475	-0.178315	0.204285	-0.121878	0.0351244	-0.217091	-0.290082	0.0629888	-0.170783	-0.278362
TCGA-3E-AAAY-01A	CGclusterA	Abnormal	Normal	Live	Male	>=65	II	0.163578	-0.282496	-0.185282	-0.141666	-0.0902748	-0.00426918	-0.151943	-0.433997	-0.204453	-0.225436	-0.327301	-0.485162	-0.133025	-0.0691493	-0.265924	-0.203539	-0.256964	-0.175999	-0.341561	-0.141889	-0.204973	-0.0800174	-0.29957	-0.271311	-0.282175	-0.265394	-0.158135	-0.310612	-0.320744	-0.418494	-0.238231	-0.189767	-0.0975792	-0.202013	-0.286581	-0.0416271	-0.243082	-0.223499	0.0863951	-0.272787	0.174639	-0.422725
TCGA-3E-AAAZ-01A	CGclusterB	Normal	Abnormal	Dead	Male	>=65	II	0.112477	0.194022	-0.2498	-0.0842648	0.0604242	-0.169131	0.0423603	0.124027	0.205828	0.0454227	0.000933236	0.15788	0.00836517	-0.321866	0.107417	0.122914	0.10413	0.0467487	-0.0406092	-0.270712	0.00800156	0.0940215	0.0727974	-0.0682628	0.156526	0.394841	0.330785	0.0590112	-0.0874416	0.07281	-0.0968167	0.263267	-0.0732656	-0.0780207	0.182313	0.380034	0.22393	-0.0489434	-0.306806	-0.199194	-0.326654	-0.358829
TCGA-F2-6879-01A	CGclusterB	Abnormal	Abnormal	Dead	Male	<65	II	0.119669	0.0921101	0.158851	0.0361218	0.0171825	0.0481232	0.0512736	0.0820634	0.137421	-0.000524121	0.277116	0.207871	0.0953392	-0.0481537	0.202546	-0.0229848	-0.0314876	-0.0327425	0.145812	0.042917	0.106788	0.199632	0.106761	0.0375755	0.221434	-0.114347	0.181465	-0.062358	0.00609477	0.204845	-0.0771999	-0.0326138	-0.0305778	-0.0367119	0.302223	-0.0252922	0.0411367	-0.0484212	0.00592996	-0.0414628	-0.106982	-0.119381
TCGA-F2-A44G-01A	CGclusterB	Normal	Abnormal	Dead	Female	>=65	II	0.151455	-0.113441	0.0617129	-0.0376396	0.0484327	0.0483428	-0.0547742	0.173507	-0.20909	0.121803	0.134184	-0.052322	0.0842942	0.110843	0.333017	-0.0262896	0.199601	-0.0208944	-0.0116526	0.047473	0.0190777	-0.0194196	0.146724	0.0798408	0.116906	0.0255205	-0.159568	0.0378348	-0.0631887	0.161486	-0.0419493	0.0775639	0.119019	-0.0356483	0.205199	-0.0252867	-0.224021	0.0915598	0.148191	-0.117334	-0.101927	-0.0821032
TCGA-F2-A44H-01A	CGclusterA	Normal	Normal	Live	Male	>=65	II	0.203444	0.126394	0.13403	0.13656	0.168548	-0.0348753	0.22018	0.00800845	0.126334	0.282281	0.253606	-0.0594862	0.152912	0.244236	-0.0582813	0.352032	0.2154	0.169921	0.256795	0.122901	0.360992	0.268031	-0.0729488	0.226691	0.0135656	0.242067	0.261557	0.0838444	0.190867	0.275226	0.130189	0.473452	0.179748	0.227586	-0.211983	0.218018	0.14946	0.405401	0.00137124	0.122867	0.319856	0.41538
TCGA-F2-A7TX-01A	CGclusterB	Abnormal	Abnormal	Dead	Male	>=65	II	0.125216	0.138192	0.321551	0.0112605	0.177151	0.118586	0.233512	0.203774	0.0323823	0.361341	0.283841	0.310747	0.0889794	0.149013	0.352259	0.149689	0.295358	-0.0544095	0.28332	0.247686	0.193598	0.0861547	0.357007	0.34614	0.314944	-0.0977204	0.0469742	0.192402	0.331251	0.334247	0.203806	-0.0629514	0.112244	0.258124	0.521288	-0.15911	-0.0188215	-0.0971884	0.266378	0.195933	0.0645342	-0.0702857
TCGA-F2-A8YN-01A	CGclusterB	Normal	Normal	Live	Male	>=65	II	0.10143	0.182569	-0.020694	0.221415	-0.116749	-0.0565111	-0.138849	0.0867998	0.231564	-0.215274	0.000162545	-0.13215	0.074234	0.0026374	0.0939468	-0.0304621	-0.178235	0.136969	-0.0834861	-0.0436565	-0.196588	-0.186282	-0.0747145	-0.0375201	-0.0777635	-0.294866	0.229709	0.0222871	-0.0317628	0.108502	-0.0991183	-0.0219262	0.192034	-0.0192083	0.0287506	-0.376259	0.0274086	0.469951	-0.181554	-0.0402879	-0.0127369	0.100468
TCGA-FB-A545-01A	CGclusterB	Abnormal	Abnormal	Dead	Female	>=65	II	0.0632509	-0.0414432	0.166561	0.228397	0.14382	0.0919192	0.0215	0.287095	0.045327	0.334475	0.0226122	0.14927	-0.0234329	0.414276	0.138943	0.207144	0.34257	0.138369	0.0760998	0.13039	0.131389	0.0555918	0.00199623	0.171097	0.118132	0.0545807	0.109908	0.168666	0.140785	0.0441651	0.132076	0.298867	0.0971851	0.0995844	0.328983	0.0442043	-0.0232072	0.360571	-0.0807555	0.223099	-0.240911	0.000369409
TCGA-FB-A5VM-01A	CGclusterA	Abnormal	Abnormal	Dead	Male	>=65	I	0.115245	-0.136314	-0.263141	-0.239538	-0.230512	-0.0727094	-0.213756	-0.379999	-0.0621886	-0.305662	-0.299818	-0.131601	-0.213918	-0.0470887	0.0376104	-0.334346	-0.2969	-0.312343	-0.241621	-0.399644	-0.204126	-0.321127	-0.168121	-0.0347232	-0.146694	-0.340073	-0.0881188	-0.185818	-0.161439	-0.314464	-0.223885	-0.323636	-0.221643	-0.274305	0.247286	-0.289959	-0.233437	0.110842	-0.201599	-0.179085	-0.12893	-0.172795
TCGA-FB-A78T-01A	CGclusterA	Abnormal	Normal	Dead	Female	>=65	II	0.145729	-0.378536	-0.242638	-0.364497	-0.296119	-0.12204	-0.266038	-0.238091	-0.413126	-0.284732	-0.259534	0.0547552	-0.0847614	-0.00209115	-0.104725	-0.423177	-0.0908019	-0.214433	-0.216676	-0.329243	-0.253132	-0.412843	-0.158399	-0.228313	-0.191978	-0.310225	-0.431557	-0.0711773	-0.219957	-0.12282	-0.0611819	-0.450862	-0.192941	-0.262421	-0.18482	-0.331679	-0.341372	-0.374883	-0.133673	-0.00558316	-0.329808	-0.488008
TCGA-FB-A7DR-01A	CGclusterB	Normal	Normal	Dead	Male	<65	II	0.147721	0.232091	0.29253	0.210987	0.149935	0.244463	0.236923	0.222057	0.210035	0.142144	0.191233	0.0165303	0.116577	0.124149	-0.0296663	0.337718	0.263438	0.119104	0.189314	0.0884083	0.269049	0.200366	-0.0234964	0.206894	0.138217	0.42796	0.229408	0.179747	0.245877	0.226869	0.238562	0.42436	0.0900966	0.225954	0.0336909	0.362483	0.340767	0.197987	0.104309	0.0540804	0.0568116	0.0496496
TCGA-FB-AAPP-01A	CGclusterA	Normal	Normal	Dead	Male	>=65	II	-0.0622353	-0.244252	-0.280778	-0.352118	-0.371684	-0.287645	-0.402332	-0.240109	-0.406236	-0.261283	-0.109389	-0.355613	-0.230801	-0.289165	0.142631	-0.526446	-0.171153	-0.333727	-0.0757657	-0.32828	-0.332613	-0.266611	0.142629	-0.0601763	0.116265	-0.449825	-0.509718	-0.132484	-0.150493	-0.0642731	-0.272322	-0.675331	-0.368786	-0.188012	0.324379	-0.422422	-0.359698	-0.268183	-0.18402	-0.169983	-0.319568	-0.0525555
TCGA-FB-AAPQ-01A	CGclusterA	Normal	Abnormal	Dead	Male	>=65	II	-0.0116603	-0.200976	-0.100234	-0.033568	-0.167665	-0.13404	-0.196603	0.0310933	-0.279135	-0.138522	-0.309587	-0.12309	0.0806245	0.0659995	0.0304839	-0.290969	-0.10552	-0.05045	-0.106772	-0.0913377	-0.143138	-0.22269	0.0473071	-0.104331	-0.105239	-0.0370433	-0.40045	-0.0561621	-0.334872	-0.271683	-0.105838	-0.240096	-0.145555	-0.116682	-0.0918733	-0.0484025	-0.272328	0.0525845	-0.14849	-0.269587	0.233596	-0.226587
TCGA-FB-AAPS-01A	CGclusterB	Normal	Normal	Live	Female	<65	II	0.173266	0.00673077	-0.0179795	-0.07685	0.054255	-0.186668	0.0854845	-0.22219	0.144979	-0.0868782	0.0669678	-0.21214	-0.0611486	-0.0182539	-0.103267	0.21709	-0.090961	-0.146282	-0.11262	-0.0178594	0.188733	0.178702	-0.11067	-0.0758552	-0.252481	0.0501846	0.289836	-0.0324707	0.0476895	-0.0892964	-0.181509	0.328688	0.0573605	0.0469602	-0.38708	0.0782398	0.22836	0.147933	-0.0625176	-0.0862379	-0.0975817	0.470648
TCGA-FB-AAPU-01A	CGclusterB	Normal	Abnormal	Dead	Female	<65	II	0.0538459	-0.195127	-0.185336	-0.224046	-0.2313	-0.188156	-0.297739	-0.0791426	-0.173283	-0.263415	-0.232561	0.181445	-0.0822511	0.010844	0.212375	-0.453926	-0.0504321	-0.00969922	-0.121443	-0.177702	-0.296723	-0.377507	0.0710086	-0.122107	0.0491375	-0.347945	-0.317348	-0.0111097	-0.218415	-0.159684	-0.0860476	-0.602233	-0.287349	-0.130823	0.133151	-0.324791	-0.204422	-0.0184352	-0.00188415	-0.0484603	-0.00665862	-0.404507
TCGA-FB-AAPY-01A	CGclusterA	Abnormal	Normal	Dead	Male	>=65	II	0.203413	-0.302028	-0.344914	-0.333577	-0.256211	-0.304226	-0.331896	-0.404753	-0.225895	-0.385728	-0.405112	-0.315231	-0.113008	-0.204352	-0.263827	-0.39943	-0.367571	-0.201476	-0.413341	-0.288527	-0.377408	-0.417748	-0.408725	-0.379884	-0.360806	-0.380594	-0.0929154	-0.183873	-0.366401	-0.385761	-0.294964	-0.345959	0.0381592	-0.264754	-0.498045	-0.320749	-0.138311	-0.351239	0.0271903	-0.207711	-0.0399446	-0.256033
TCGA-FB-AAPZ-01A	CGclusterB	Abnormal	Abnormal	Live	Male	<65	II	0.0783345	0.14425	0.347982	0.279983	0.253154	0.323418	0.31395	0.381501	0.178777	0.401923	0.231594	0.274281	0.219929	0.362592	0.137732	0.364872	0.338395	0.361317	0.274232	0.347356	0.230389	0.285099	0.0482108	0.306434	0.220775	0.279266	-0.0941634	0.340769	0.275263	0.241519	0.315323	0.363247	0.291061	0.163584	0.232362	0.197765	0.061941	0.0380543	0.254765	0.376746	0.0550847	-0.241029
TCGA-FB-AAQ0-01A	CGclusterA	Abnormal	Abnormal	Dead	Male	>=65	II	0.0568711	-0.31789	-0.347061	-0.332241	-0.335763	-0.202842	-0.394119	-0.205931	-0.338057	-0.325484	-0.348016	-0.077576	-0.220096	-0.195373	-0.0749825	-0.419405	-0.273416	-0.0707773	-0.323956	-0.397258	-0.42173	-0.327512	-0.0734495	-0.214158	-0.141884	-0.289522	-0.27886	-0.242185	-0.484448	-0.330336	-0.35969	-0.449305	-0.24126	-0.378923	-0.0797242	-0.274422	-0.342174	-0.446943	-0.252537	-0.409374	-0.374959	-0.478871
TCGA-FB-AAQ1-01A	CGclusterB	Abnormal	Abnormal	Dead	Male	<65	II	-0.0424393	-0.258241	0.0486533	-0.0914798	-0.212108	-0.123008	-0.205282	-0.0700062	-0.331865	-0.101002	-0.312706	-0.0622998	-0.193218	0.120051	0.116997	-0.216834	-0.264972	-0.110275	-0.145413	-0.16602	-0.208836	-0.32485	-0.0763848	-0.0495366	-0.0781044	-0.243699	-0.297826	-0.084581	-0.277957	-0.230397	-0.201139	-0.264211	-0.182388	-0.324185	0.320839	-0.282768	-0.221643	-0.42501	-0.142451	-0.0617909	-0.16037	-0.31146
TCGA-FB-AAQ2-01A	CGclusterA	Abnormal	Abnormal	Dead	Female	>=65	II	-0.0186131	-0.026302	0.0640574	0.0143031	-0.138355	-0.177501	-0.115848	0.047619	-0.0962453	0.0375374	0.059172	0.176831	-0.229428	-0.0566005	0.0602446	-0.183483	-0.168029	-0.105028	-0.108257	-0.14796	-0.130868	-0.298859	0.153546	0.272848	0.365156	-0.0355592	-0.1703	-0.00639498	0.0223801	0.0243715	-0.0814875	-0.281422	-0.0414863	-0.193851	0.488803	-0.109054	-0.174681	-0.240879	-0.238218	0.119632	-0.0235564	-0.160552
TCGA-FB-AAQ3-01A	CGclusterA	Abnormal	Abnormal	Dead	Female	>=65	II	0.12677	-0.332187	-0.439126	-0.436308	-0.37136	-0.323426	-0.416775	-0.499545	-0.38649	-0.460805	-0.473206	-0.445011	-0.383356	-0.451361	0.00988431	-0.470478	-0.589887	-0.295729	-0.468581	-0.414779	-0.384377	-0.246884	-0.187204	-0.293502	-0.102154	-0.377068	-0.353201	-0.419301	-0.548037	-0.620222	-0.490877	-0.553408	-0.323454	-0.494139	-0.107898	-0.272649	-0.258334	-0.40753	-0.312634	-0.576752	-0.326364	-0.235928
TCGA-FB-AAQ6-01A	CGclusterA	Abnormal	Abnormal	Dead	Male	>=65	I	-0.0187257	-0.137053	-0.342175	-0.223871	-0.263945	-0.407261	-0.379386	-0.389858	-0.140578	-0.186532	-0.372676	-0.135633	-0.213109	-0.0723854	0.2541	-0.379742	-0.175821	-0.208607	-0.198611	-0.364905	-0.270349	-0.350762	0.0274893	-0.20165	-0.132688	-0.362019	-0.144347	-0.22958	-0.285507	-0.310533	-0.265901	-0.408166	-0.0951885	-0.323637	0.0918644	-0.312846	-0.201892	0.22195	-0.213604	-0.292075	-0.283504	-0.326531
TCGA-H6-8124-01A	CGclusterB	Abnormal	Abnormal	Live	Female	<65	II	-0.0602927	0.159136	0.185619	0.102273	0.12335	-0.0915157	0.0320406	0.249879	0.108513	0.223175	0.212272	-0.061404	-0.137958	0.130841	0.194513	0.233493	0.173961	0.0525183	0.0586343	0.193522	0.0427951	0.208709	0.176526	-0.00762807	0.01297	0.311726	0.153418	-0.03814	0.0924542	0.151085	0.0967817	0.3588	-0.16063	0.000121802	0.288345	0.134172	-0.0211643	0.256484	-0.0815852	0.0240547	-0.383461	0.416351
TCGA-H6-A45N-01A	CGclusterA	Abnormal	Normal	Dead	Female	>=65	II	0.207918	0.126828	0.23987	0.39543	0.294048	0.400484	0.305807	0.215717	0.2804	0.32562	0.240774	0.283424	0.283424	0.220258	-0.0205563	0.371157	0.157817	0.280812	0.10879	0.275306	0.243071	0.203268	-0.277143	0.085919	-0.0858251	0.260478	0.377179	0.0753274	0.291065	0.287852	0.242471	0.462929	0.36241	0.285123	-0.398054	0.285969	0.30229	0.356728	0.284532	0.265358	0.304549	0.0524781
TCGA-H8-A6C1-01A	CGclusterA	Abnormal	Abnormal	Live	Male	<65	II	0.119716	-0.307266	-0.327722	-0.318875	-0.1069	-0.13424	-0.238768	-0.248023	-0.219366	0.0037572	-0.342423	-0.154586	-0.0620197	-0.199203	-0.0337795	-0.211842	-0.217782	-0.214816	-0.0894548	-0.0656858	-0.290248	-0.235865	-0.140415	-0.308862	-0.269479	-0.371563	-0.159007	-0.292796	-0.242102	-0.239299	-0.223896	-0.0923789	0.0369307	-0.2003	-0.124371	-0.367406	-0.164223	-0.147195	0.0249847	-0.217308	-0.0873091	-0.218588
TCGA-HV-A5A3-01A	CGclusterA	Abnormal	Abnormal	Dead	Male	<65	II	0.145357	-0.0728294	-0.0191915	0.144395	0.00255721	-0.00455662	-0.0557793	-0.0248069	0.00586285	0.106122	-0.16448	0.136447	0.0712381	0.250661	0.0805116	-0.00928649	-0.107136	0.100407	-0.0858019	-0.0176934	-0.156542	-0.306886	-0.0747765	-0.206378	-0.24705	-0.0171287	0.167059	-0.0630737	-0.0866413	-0.0337047	0.0564067	0.0503995	0.173841	-0.0351825	-0.264284	-0.0489751	-0.114212	0.220193	-0.0426278	-0.0783436	-0.155123	-0.0890741
TCGA-HV-A5A4-01A	CGclusterB	Normal	Normal	Live	Female	>=65	II	0.160155	-0.0822543	-0.200989	0.0217043	0.0305585	0.107987	0.0191597	-0.044296	0.0645932	0.0348851	-0.00307157	0.015505	-0.0262314	-0.0359476	0.21454	0.0560195	-0.0356545	0.147294	-0.0646857	-0.171504	-0.103221	0.0619229	-0.208056	-0.264205	-0.194018	0.219368	0.268396	-0.124288	-0.19706	-0.0357214	-0.037873	0.255567	-0.107532	-0.137984	-0.191479	0.0915625	0.107263	-0.364632	-0.0149208	-0.263298	-0.355453	-0.0540114
TCGA-HV-A5A5-01A	CGclusterB	Normal	Normal	Live	Female	<65	II	0.169999	-0.00896336	0.157596	0.223353	0.0477351	0.29519	0.141496	0.0594023	0.0269422	0.0869355	0.0502678	-0.00294289	0.106262	0.159671	-0.331286	0.190402	0.182453	0.244796	0.0501149	0.190488	0.0647445	0.0616361	-0.132913	0.0759643	0.161729	-0.182914	0.119263	0.0967839	0.135807	0.277751	0.141555	0.162448	0.216015	0.163514	-0.347396	-0.203266	0.137381	0.351618	0.186327	0.339911	0.222844	0.308062
TCGA-HV-A5A6-01A	CGclusterB	Abnormal	Abnormal	Dead	Female	>=65	II	0.1623	-0.00925465	-0.0510042	-0.0769123	-0.0341149	0.217304	-0.0241115	-0.0234257	-0.0124878	0.0140523	-0.159452	-0.131752	0.0184284	0.0439712	0.209954	-0.122172	-0.0996681	-0.00331722	0.00223631	-0.157403	-0.0544551	-0.157517	0.0646614	0.0227406	-0.0084534	-0.209041	0.139543	-0.00538181	-0.0190862	-0.0836102	-0.206076	-0.217798	-0.0338826	-0.0477089	0.204842	-0.272757	0.0330063	-0.0302194	0.0111849	-0.0231569	-0.0699982	0.063197
TCGA-HV-A7OL-01A	CGclusterA	Abnormal	Abnormal	Live	Male	>=65	II	0.0259662	-0.376939	-0.414747	-0.284059	-0.367925	-0.301688	-0.389647	-0.473065	-0.405357	-0.449661	-0.371813	-0.302429	-0.2904	-0.209442	-0.0485581	-0.500707	-0.416713	-0.231037	-0.424789	-0.476542	-0.361038	-0.513982	-0.366461	-0.279554	-0.268339	-0.430775	-0.350868	-0.361456	-0.347271	-0.409519	-0.396473	-0.556026	-0.0685074	-0.352299	-0.0660387	-0.39139	-0.312006	-0.224524	-0.140187	-0.270879	-0.253184	-0.303389
TCGA-HV-A7OP-01A	CGclusterA	Normal	Abnormal	Live	Male	>=65	II	0.332854	-0.382356	-0.496789	-0.456344	-0.455172	-0.496334	-0.471212	-0.519161	-0.446221	-0.483081	-0.442215	-0.444105	-0.380786	-0.475485	-0.312111	-0.599463	-0.46695	-0.392258	-0.512164	-0.550466	-0.406154	-0.526833	-0.357896	-0.381912	-0.375414	-0.439649	-0.411865	-0.375442	-0.491581	-0.423868	-0.448597	-0.642443	-0.360645	-0.512197	-0.197444	-0.479452	-0.461645	-0.422281	-0.432286	-0.412623	-0.403666	-0.216305
TCGA-HV-AA8V-01A	CGclusterB	Normal	Normal	Live	Male	<65	II	0.14375	0.0443597	0.0211633	0.142267	0.134665	0.0604645	0.0944644	0.0937632	0.219843	-0.0292952	-0.0109385	-0.05355	-0.0391155	-0.00242959	-0.307139	0.272229	-0.114605	0.0849913	0.0608214	-0.105366	0.0669207	0.179805	-0.298114	-0.240502	-0.268227	0.107938	0.455955	-0.0117309	-0.061927	0.0174213	-0.131699	0.412672	-0.00862807	-0.000184959	-0.501623	0.0237429	0.23303	0.454127	-0.120021	-0.133607	-0.130003	0.500845
TCGA-HV-AA8X-01A	CGclusterB	Abnormal	Abnormal	Dead	Female	>=65	II	0.150506	-0.0634384	-0.16417	-0.0304017	-0.171419	-0.117439	-0.265542	-0.269662	0.071689	-0.286295	-0.232669	-0.0546687	-0.0719007	-0.0346036	-0.0172193	-0.422539	-0.303924	-0.078998	-0.0876741	-0.215018	-0.213168	-0.341161	-0.0924855	-0.192829	0.0141948	-0.399666	0.0704514	-0.272271	-0.255882	-0.162486	-0.214799	-0.481516	-0.105089	-0.272284	0.175963	-0.420469	-0.0746507	0.126106	-0.191362	-0.183173	-0.250705	0.0390068
TCGA-HZ-7289-01A	CGclusterA	Normal	Normal	Dead	Male	>=65	II	0.0810044	-0.0940044	-0.0237681	-0.107862	-0.142958	-0.135575	-0.295612	0.0272941	-0.228715	-0.0733906	0.205823	0.160296	-0.173978	0.0630729	0.00275494	-0.349507	0.0346927	-0.200103	0.0447255	0.0255924	-0.0400864	-0.134212	0.190291	0.0700631	-0.0235557	-0.215357	-0.1927	0.0382028	0.0709829	0.209066	0.0634412	-0.470853	0.0177555	0.00975197	0.243144	-0.271663	0.0109691	0.14386	-0.137812	0.0970095	-0.0859066	0.00577604
TCGA-HZ-7918-01A	CGclusterB	Normal	Normal	Live	Male	>=65	II	0.18931	0.0376092	0.233754	-0.0129027	0.0684582	-0.128591	0.117505	0.129584	0.020151	0.192409	0.197693	0.0545937	0.0323041	-0.0581989	-0.0238792	0.0908785	0.180368	-0.0481707	0.292738	0.210567	0.168491	0.31848	0.243386	0.0807976	0.131494	0.0120339	-0.134129	0.109496	0.216821	0.215081	0.16021	0.1478	-0.143094	0.153239	0.0613031	-0.00112426	0.0575632	0.131755	0.26089	0.27808	0.142978	0.119607
TCGA-HZ-7919-01A	CGclusterB	Normal	Abnormal	Dead	Female	<65	II	0.114073	0.139755	0.301232	0.274442	0.218462	0.412705	0.257392	0.427132	0.166806	0.225758	0.275328	0.312621	0.181011	-0.0886782	0.214616	0.29174	0.226506	0.205093	0.298069	0.20439	0.148734	0.359867	0.214147	0.186631	0.315751	0.398285	-0.0273123	0.0545825	0.154701	0.222182	0.219102	0.235236	0.0481094	0.185647	0.32187	0.377414	0.0745678	-0.121262	0.23013	0.0947244	0.00687373	-0.0450251
TCGA-HZ-7922-01A	CGclusterB	Abnormal	Abnormal	Live	Female	<65	II	0.0994679	0.235522	0.358934	0.178219	0.309277	0.330617	0.328236	0.508567	0.337758	0.367122	0.266055	0.28155	0.218263	0.0513656	0.0283117	0.393622	0.263984	0.282025	0.312521	0.263489	0.273023	0.498727	0.17404	0.277224	0.262098	0.382822	0.286257	0.120087	0.324799	0.3557	0.213948	0.429784	0.130725	0.222487	0.190315	0.259361	0.193166	0.352088	-0.00186525	0.26826	0.0412903	0.222792
TCGA-HZ-7925-01A	CGclusterB	Abnormal	Abnormal	Dead	Male	>=65	II	0.156863	0.226327	0.278356	0.21829	0.27261	0.132562	0.305955	0.324026	0.152209	0.305973	0.3032	0.173595	0.106295	0.0860666	0.072593	0.37676	0.175113	0.0159656	0.311079	0.278867	0.288084	0.386274	0.230627	0.160806	0.160863	0.37758	0.20455	0.0952999	0.298305	0.184729	0.112166	0.375166	0.147467	0.147273	0.181576	0.313198	0.137879	0.366015	0.116555	0.0235613	0.166465	0.247219
TCGA-HZ-7926-01A	CGclusterB	Abnormal	Abnormal	Dead	Male	<65	II	0.0869724	0.194485	0.366538	0.231209	0.234309	0.302677	0.277388	0.474742	0.0517931	0.229691	0.353953	0.213694	0.18146	0.091705	0.00217274	0.269034	0.364841	0.277029	0.323375	0.324835	0.226898	0.172382	0.152669	0.00556751	0.135572	0.272253	0.0198586	0.0318036	0.164729	0.191391	0.279961	0.284186	0.110356	0.264464	0.0710899	0.25138	0.0941097	0.0244784	0.291756	0.246554	0.17794	-0.163146
TCGA-HZ-8001-01A	CGclusterA	Normal	Normal	Live	Male	>=65	III	0.0999736	-0.112906	-0.335839	-0.0993755	-0.157376	-0.129546	-0.117772	-0.297309	-0.259282	-0.2118	-0.217045	-0.214929	-0.163833	-0.312876	-0.167332	-0.0142021	-0.394484	-0.128821	-0.370075	-0.242445	-0.121133	-0.00369133	-0.202238	-0.111188	-0.0653085	0.0378546	-0.161761	-0.219953	-0.25949	-0.375949	-0.385129	0.192963	-0.100253	-0.287046	-0.220236	0.142309	-0.143051	0.2593	-0.158216	-0.317052	-0.0231977	0.188107
TCGA-HZ-8003-01A	CGclusterA	Normal	Normal	Dead	Female	>=65	II	0.248924	0.0988056	0.242287	-0.0250651	0.144019	-0.0381358	0.191798	0.295008	0.0150042	0.27538	0.327683	0.296608	0.0234873	-0.0780872	-0.193811	0.241828	0.234964	0.0111471	0.373464	0.286656	0.247402	0.280488	0.137876	0.241867	0.137019	0.0455797	-0.0762535	0.155898	0.36401	0.369272	0.24596	0.252404	0.087721	0.216197	0.00193595	-0.0188269	0.120733	-0.122744	0.088766	0.35258	0.106907	0.0453707
TCGA-HZ-8315-01A	CGclusterB	Abnormal	Normal	Dead	Female	<65	II	0.0481615	0.261501	0.093453	0.105141	0.179523	0.150186	0.208815	0.334701	0.341756	0.0293615	0.0984361	0.116462	0.026113	-0.130733	-0.150437	0.23474	0.076449	0.165832	0.135141	0.151744	0.126586	0.430529	0.0624368	-0.227077	-0.0126009	0.0892367	0.313176	-0.0733599	0.122607	0.0514433	0.125958	0.176646	-0.0908055	0.141241	-0.308993	0.0719849	0.171132	-0.565946	0.0765605	-0.0709066	0.133724	-0.220547
TCGA-HZ-8317-01A	CGclusterB	Normal	Normal	Dead	Female	>=65	II	0.15657	0.103509	0.143952	0.0614257	0.0866148	-0.107191	0.0779287	0.229115	-0.0735309	0.220589	0.0696023	-0.122187	-0.0497908	0.101467	-0.00794868	0.247431	0.102645	0.139415	0.317414	0.110181	0.189451	0.190931	0.131837	0.223153	0.366856	0.226214	-0.228227	0.221099	0.246818	0.0393075	0.168992	0.419796	0.049265	0.122412	0.282821	0.313078	0.187624	0.25987	0.147923	-0.076419	-0.0259106	-0.0347519
TCGA-HZ-8636-01A	CGclusterB	Abnormal	Abnormal	Dead	Female	<65	IV	-0.0162863	0.290979	0.218775	0.235112	0.270838	0.421591	0.292581	0.354564	0.263759	0.302754	0.337172	0.236959	0.158365	-0.0117261	-0.0149909	0.357742	0.182063	0.144115	0.21245	0.330726	0.193607	0.414896	0.117763	-0.0194486	0.0696001	0.292536	0.34158	-0.0248102	0.193615	0.198573	0.175893	0.504989	-0.00344493	0.194046	-0.00979078	0.213654	0.161988	0.0294402	0.177582	0.0188269	0.168223	0.187799
TCGA-HZ-8637-01A	CGclusterA	Abnormal	Normal	Dead	Female	>=65	II	0.125063	-0.200595	-0.0204243	-0.0945156	-0.0324154	0.0305178	-0.0382328	-0.194277	-0.236625	0.127011	-0.170922	-0.0317052	-0.128856	-0.0385979	-0.0232471	-0.197433	0.0113996	-0.320825	-0.0287689	0.0594094	-0.136862	-0.298916	0.116892	-9.56e-05	0.181652	-0.357225	-0.35888	-0.0949991	0.0701624	-0.12643	-0.133482	-0.194336	-0.0779869	0.179297	0.195324	-0.275083	-0.126126	-0.408246	0.194317	0.108267	0.230692	-0.326857
TCGA-HZ-A49G-01A	CGclusterB	Normal	Normal	Live	Female	<65	II	0.216372	-0.0499441	0.174297	0.142288	0.173871	0.0329826	0.227757	0.0120681	-0.0218988	0.315237	0.0934014	0.0980552	0.0437318	3.37e-05	-0.20433	0.31152	0.147483	0.0251283	0.22839	0.277762	0.2399	0.312722	-0.297483	-0.115545	-0.180304	0.059048	0.164875	0.194385	0.292936	0.276329	0.291283	0.351169	0.245164	0.198954	-0.399131	-0.0404162	0.199532	-0.0053417	0.1812	0.370191	0.155152	-0.237974
TCGA-HZ-A49H-01A	CGclusterA	Normal	Normal	Live	Female	>=65	II	0.188283	-0.223973	-0.255469	-0.18392	-0.179336	-0.107461	-0.211183	-0.480601	-0.234558	-0.336012	-0.0926221	-0.366759	-0.205122	-0.110123	-0.106715	-0.198209	-0.138573	-0.216325	-0.259941	-0.19074	0.0467669	-0.0705913	-0.301308	-0.182144	-0.255428	-0.197472	-0.28708	-0.09078	-0.127912	-0.208733	0.00156302	-0.214402	0.0372325	-0.0708613	-0.378111	-0.0295562	-0.13158	0.299327	0.0959229	-0.292	-0.129804	-0.0355591
TCGA-HZ-A49I-01A	CGclusterB	Abnormal	Abnormal	Dead	Male	>=65	II	0.0494146	-0.0346688	0.0182587	0.0949589	0.0655457	-0.0328655	0.00100927	-0.0233546	0.192229	0.0830128	0.0364863	-0.0485672	-0.058519	-0.0927475	0.0640179	-0.0298168	-0.014984	0.0468562	-0.113817	-0.222836	0.0985931	-0.0879603	-0.390957	-0.291315	-0.464641	0.242669	0.33393	-0.217347	-0.149308	0.0297058	-0.0871586	0.135259	0.146905	-0.0704388	-0.443007	0.0810025	0.00632797	-0.0514057	0.231835	0.00181403	0.116926	-0.348858
TCGA-HZ-A4BH-01A	CGclusterB	Abnormal	Normal	Live	Male	>=65	II	0.0847263	0.29673	0.398788	0.454803	0.383797	0.571184	0.391827	0.440127	0.338091	0.501152	0.423623	0.342819	0.134343	0.207639	0.252491	0.437714	0.451704	0.313951	0.345237	0.371171	0.330366	0.358718	-0.0410411	0.357632	0.290627	0.406867	0.182402	0.178414	0.390471	0.325731	0.284414	0.454048	0.333739	0.336111	0.324864	0.360365	0.235423	0.334492	0.359773	0.307764	0.307283	-0.192345
TCGA-HZ-A4BK-01A	CGclusterA	Abnormal	Abnormal	Live	Male	>=65	II	0.0648941	-0.131682	-0.0187133	-0.018963	0.0525651	0.00464616	-0.000946256	-0.155461	0.223733	0.00564075	-0.0727556	0.143257	0.224107	-0.00623791	0.0166661	0.0135327	0.149376	0.00761315	0.151131	0.0335635	-0.02773	-0.248105	-0.199145	0.0868542	-0.0719829	-0.0594304	0.304499	0.126174	0.0164599	0.258636	0.15802	0.130525	0.0119072	0.195306	-0.294416	0.0555234	0.281084	0.3186	0.0736416	0.258278	-0.0364785	-0.0530529
TCGA-HZ-A77O-01A	CGclusterB	Abnormal	Normal	Dead	Female	>=65	II	0.0562356	-0.139721	-0.0088522	-0.252262	-0.132901	-0.0534524	-0.172351	-0.293088	-0.2507	0.0458456	-0.0560186	-0.11241	-0.140274	0.167906	0.0773732	-0.106423	-0.14772	-0.0454645	-0.203445	-0.197936	-0.0380936	-0.298816	-0.0104766	0.0250639	-0.000759218	-0.100232	-0.190973	-0.196564	-0.0838542	-0.0698582	-0.127936	0.0565524	-0.119324	-0.305497	0.304146	-0.236929	-0.198995	0.137297	-0.14905	-0.0772699	-0.379107	0.170969
TCGA-HZ-A77P-01A	CGclusterA	Normal	Normal	Live	Male	>=65	II	0.20444	0.0656178	-0.068684	0.00803495	0.0183161	0.021963	0.0951967	-0.110877	-0.0309029	-0.0772013	0.0454102	-0.102874	-0.0358878	-0.215741	-0.392743	0.152266	0.0841539	-0.0638122	0.0967146	0.0526227	0.104998	0.122699	-0.119063	0.127144	0.16409	0.195728	0.00881309	0.272598	0.229145	0.0721777	0.133668	0.179376	0.118495	0.170779	-0.242915	0.278105	0.313051	0.0217382	-0.0617004	0.0128883	-0.0710069	-0.31996
TCGA-HZ-A77Q-01A	CGclusterB	Abnormal	Normal	Live	Female	<65	II	0.163649	0.285442	0.379484	0.237848	0.336035	0.227309	0.364789	0.187273	0.376237	0.232097	0.359569	0.0167817	0.228692	0.223791	0.0527988	0.404627	0.255558	0.0475709	0.241305	0.236183	0.41146	0.389483	-0.0449482	0.0340075	-0.166292	0.429883	0.313654	0.0637691	0.278046	0.22551	0.179792	0.524583	0.29469	0.276712	-0.207061	0.479808	0.308642	0.227242	0.378143	0.220487	0.337738	0.217581
TCGA-HZ-A8P1-01A	CGclusterA	Normal	Abnormal	Live	Male	>=65	I	0.00963867	-0.299946	-0.347161	-0.380162	-0.360893	-0.0463443	-0.296054	-0.362363	-0.411775	-0.33502	-0.295374	-0.186071	-0.18558	-0.264597	0.10898	-0.465347	-0.247629	-0.144865	-0.287592	-0.387581	-0.374867	-0.433053	0.102682	-0.185924	-0.00853919	-0.349699	-0.390839	-0.248388	-0.267528	-0.321953	-0.267857	-0.60826	-0.204066	-0.316879	0.0779611	-0.310094	-0.309255	-0.19093	-0.127586	-0.308917	-0.161777	-0.463709
TCGA-HZ-A9TJ-01A	CGclusterA	Abnormal	Abnormal	Live	Male	>=65	IV	-0.11336	-0.295298	-0.220857	-0.194423	-0.217097	0.0207978	-0.229045	0.0433447	-0.301887	-0.147051	-0.3379	0.0252963	-0.061279	-0.215743	0.043138	-0.369858	-0.173562	0.140097	-0.225422	-0.321377	-0.160715	-0.341846	-0.0237104	-0.286893	-0.22051	0.0166494	-0.404548	-0.178952	-0.239436	-0.303264	-0.348647	-0.306549	-0.170034	-0.275892	-0.0477938	-0.0422017	-0.322964	-0.253706	-0.0852538	-0.109505	-0.403146	-0.414721
TCGA-IB-7644-01A	CGclusterB	Abnormal	Abnormal	Dead	Female	>=65	IV	0.15586	0.200662	0.0680291	0.112874	0.115963	0.157314	0.037113	0.216614	0.0316742	0.0754615	0.297774	0.0207139	-0.00681174	-0.0679507	0.208418	-0.0044356	0.145298	0.0579255	0.219012	0.0573432	0.0342368	0.113618	0.112887	-0.0334379	0.108682	0.288276	0.18931	-0.0907635	-0.039747	0.222317	0.0372103	0.102995	-0.0375195	0.0600932	0.28952	0.0554143	0.0746775	-0.268442	0.162387	-0.0403382	-0.0184262	-0.211658
TCGA-IB-7645-01A	CGclusterB	Normal	Normal	Dead	Female	<65	II	0.169285	0.282551	0.363627	0.230073	0.31439	0.150156	0.345388	0.43275	0.352411	0.349516	0.370089	0.229306	0.108202	0.162029	-0.0748345	0.447406	0.347215	0.0892576	0.340106	0.439268	0.360729	0.503227	0.120578	0.0636893	0.0981151	0.328951	0.0772716	0.201807	0.375755	0.313151	0.234009	0.493981	0.313693	0.368833	-0.145332	0.312417	0.142266	0.0144913	0.310068	0.281085	0.408816	0.133546
TCGA-IB-7646-01A	CGclusterB	Abnormal	Abnormal	Dead	Male	<65	II	0.0923331	-0.0221073	0.222534	0.0468903	0.141674	0.251478	0.132896	0.343408	-0.155351	0.28997	0.164734	0.0740662	-0.0241035	0.0699602	0.208041	0.259113	0.158509	-0.00348741	0.267786	0.106173	0.190767	0.243124	0.177564	0.135453	0.173619	0.236898	-0.181802	-0.0948512	0.0829188	0.056694	0.0839759	0.352972	-0.186823	-0.0382789	0.438558	0.240771	-0.102846	0.0239707	0.0977025	-0.037302	0.104764	-0.19829
TCGA-IB-7649-01A	CGclusterA	Abnormal	Normal	Dead	Female	>=65	II	0.221182	0.187509	0.162446	0.141737	0.183846	0.000452083	0.236659	0.310852	0.114002	0.134144	0.182929	0.150678	0.065483	-0.147914	-0.247239	0.233049	0.10118	0.130142	0.191668	0.251837	0.161107	0.315409	0.0848346	0.0107426	0.0609983	0.280781	0.108277	0.0994974	0.0778912	0.26324	0.177907	0.313786	-0.102758	0.131332	-0.263304	0.176701	0.167786	0.108549	0.0918809	0.196411	0.127391	0.225409
TCGA-IB-7651-01A	CGclusterB	Normal	Normal	Dead	Female	<65	II	0.115865	0.0345821	0.134154	-0.11494	0.146819	0.221784	0.169397	0.187698	0.132794	0.272837	0.179706	-0.025298	0.124675	-0.279318	0.10903	0.231914	0.1315	-0.0336878	0.175013	0.0195315	0.0538243	0.234809	0.0532218	0.174627	0.16152	0.165968	0.224666	0.131414	0.0671669	0.211391	-0.0158319	0.296329	-0.103402	0.129141	0.166701	0.141036	0.0566137	0.08449	0.102407	0.129638	-0.0518544	-0.109776
TCGA-IB-7654-01A	CGclusterB	Abnormal	Normal	Dead	Male	>=65	II	0.180768	0.307209	0.224171	0.271996	0.213894	-0.101835	0.296583	0.445878	0.200973	0.234456	0.248017	0.459888	0.212117	0.0568151	-0.208505	0.41604	0.258545	0.158936	0.291113	0.214893	0.25947	0.512394	0.2687	-0.0833093	-0.0569759	0.275133	0.190733	0.114127	0.147619	0.380836	0.330428	0.402515	-0.0392341	0.190088	-0.199294	0.204701	0.0477507	-0.180231	-0.0135139	0.109553	0.153996	0.28
TCGA-IB-8126-01A	CGclusterA	Normal	Normal	Live	Female	>=65	III	0.187386	-0.00285214	0.0603568	-0.112702	0.0272317	-0.275699	0.00543152	-0.0660596	-0.240921	-0.0603988	0.190298	-0.111079	-0.0734826	0.0810041	-0.22207	0.0438675	0.0362351	-0.100625	0.1352	0.154379	0.160306	0.247957	0.00203709	-0.030032	-0.13753	-0.073213	-0.283536	0.0491144	0.051526	0.0963671	0.218537	-0.0365685	0.0169066	0.033832	-0.258724	0.00412249	0.0562193	-0.160946	-0.0560597	0.0768529	-0.0626459	-0.237937
TCGA-IB-8127-01A	CGclusterB	Abnormal	Abnormal	Live	Male	<65	II	0.0343266	0.150353	0.0427727	0.0920764	0.167782	0.400473	0.272128	0.187836	0.166295	0.30154	0.032942	0.0417084	0.0562049	-0.152513	0.210059	0.194253	0.101398	0.0414771	0.0901166	0.15756	0.0735207	0.315435	0.0223993	-0.0336297	0.0498278	0.247954	0.263611	-0.066019	0.040131	0.159561	0.119705	0.170944	0.0112832	0.134611	-0.0602379	0.166362	-0.0575664	-0.377359	0.157523	-0.0521549	0.108924	-0.163033
TCGA-IB-A5SO-01A	CGclusterB	Normal	Normal	Dead	Male	>=65	II	0.177601	0.0885021	0.161528	0.296421	0.224684	-0.0660862	0.255023	0.200074	0.356194	0.018416	0.0964889	0.0356083	-0.0201032	-0.0429876	0.0344802	0.269361	0.00201494	0.0124109	0.0354715	0.0114315	0.222584	0.226236	-0.247754	0.0811097	-0.171068	0.315188	0.333394	-0.124121	0.0805044	0.123712	0.250327	0.42118	0.144186	0.0865218	-0.276291	0.134849	0.291291	0.070653	-0.030222	-0.0185053	-0.0257359	0.327967
TCGA-IB-A5SP-01A	CGclusterB	Abnormal	Abnormal	Live	Male	>=65	II	0.115209	-0.246898	-0.145297	-0.142606	-0.327952	-0.0838853	-0.284392	-0.30459	-0.351708	-0.307947	-0.203729	-0.247683	0.0215393	-0.294835	-0.13159	-0.436643	-0.19851	-0.0378965	-0.288061	-0.313277	-0.412829	-0.406782	-0.157573	-0.156308	-0.0464909	-0.435376	-0.356337	0.0143134	-0.299884	-0.110076	-0.211572	-0.591745	-0.128424	-0.206316	-0.0016187	-0.388386	-0.264934	0.0598059	0.0620848	-0.053181	0.0601401	-0.142881
TCGA-IB-A5SQ-01A	CGclusterB	Normal	Normal	Dead	Female	<65	I	0.176056	0.287207	0.214805	0.207	0.288225	0.135227	0.275447	0.123662	0.254844	0.303475	0.324299	0.181768	0.0884284	0.271003	0.105975	0.393067	0.361748	0.0637586	0.271641	0.264706	0.38687	0.409279	0.0352086	0.287092	0.237795	0.401215	0.295509	0.168381	0.385654	0.21357	0.280112	0.474042	-0.00346629	0.29033	0.223171	0.379767	0.317938	0.457551	0.0917067	0.163927	0.329019	0.485374
TCGA-IB-A5SS-01A	CGclusterB	Abnormal	Normal	Dead	Female	<65	II	0.175117	0.300366	0.438189	0.382744	0.327326	0.383377	0.357258	0.346461	0.313303	0.299655	0.436405	0.356621	0.280928	0.290234	0.211455	0.416266	0.305732	0.12801	0.325178	0.140423	0.378754	0.235275	0.126801	0.139243	0.171342	0.399277	0.406302	-0.0356843	0.295439	0.418613	0.201474	0.51067	0.0222868	0.233493	0.292293	0.262811	0.235743	0.455645	0.263368	0.212085	0.130481	0.423252
TCGA-IB-A6UF-01A	CGclusterB	Abnormal	Abnormal	Live	Male	<65	II	0.0516725	-0.278604	-0.143239	-0.0498368	-0.209646	-0.0855561	-0.280624	-0.256992	-0.406156	-0.295522	-0.162856	-0.173681	-0.185756	-0.214947	-0.101543	-0.203099	-0.235489	-0.217839	-0.147128	0.00171071	-0.268168	-0.326479	0.09453	-0.146758	-0.133657	-0.324003	-0.380465	-0.194304	-0.331707	-0.19686	-0.227178	-0.312815	-0.203026	-0.232038	0.0402865	-0.295764	-0.393094	-0.111935	-0.27164	-0.177677	-0.194958	-0.346409
TCGA-IB-A6UG-01A	CGclusterB	Abnormal	Normal	Dead	Male	>=65	II	0.0233898	-0.0745296	0.0931312	-0.193045	0.015029	-0.148071	-0.156677	0.0392036	-0.244863	0.141742	0.110441	0.178558	-0.202465	0.081212	-0.106734	-0.145565	0.258353	-0.114852	0.182412	0.048941	-0.0938689	-0.172228	0.113576	-0.170479	-0.196977	-0.317192	0.0481748	0.0644331	0.0419283	0.130974	0.0350656	-0.329666	-0.0410421	-0.0396112	-0.062546	-0.360768	-0.136673	-0.313335	0.00878799	0.2639	-0.152977	-0.441585
TCGA-IB-A7LX-01A	CGclusterA	Normal	Abnormal	Dead	Male	<65	II	0.109077	0.0437649	0.0589147	0.0911371	-0.0165576	-0.215367	-0.0791592	0.14869	-0.127174	0.0395863	-0.100294	0.122525	-0.0153299	0.184062	0.0564483	0.00359742	-0.0242525	0.0371638	0.00580678	-0.0352984	-0.164467	-0.168411	0.017946	-0.10831	-0.107781	0.097271	0.0795263	-0.115168	0.0572315	-0.125242	0.0518539	0.026682	-0.135614	-0.124233	0.139258	0.0485203	-0.0800201	-0.293568	-0.172698	-0.0421751	-0.302998	-0.416171
TCGA-IB-A7M4-01A	CGclusterA	Abnormal	Abnormal	Live	Male	>=65	II	0.109231	-0.0733332	-0.176057	-0.254206	-0.169105	0.081158	-0.26438	-0.202189	-0.187412	-0.0598286	-0.052346	-0.000197091	-0.0176025	0.10748	0.247017	-0.38783	-0.069941	-0.174931	-0.148841	-0.221755	-0.135789	-0.281152	-0.0821692	-0.0336832	-0.0720012	-0.280557	-0.0655257	-0.16726	-0.0218214	-0.0408463	0.00330739	-0.452527	-0.0269551	-0.0977258	0.371876	-0.389475	-0.107569	-0.243898	-0.218482	0.245407	-0.109743	-0.366856
TCGA-IB-AAUN-01A	CGclusterB	Abnormal	Abnormal	Dead	Female	>=65	I	0.170367	0.0725901	0.0804745	0.15215	0.0198734	0.0434938	0.0259002	0.205264	-0.00229904	0.0342104	0.0971792	0.371838	0.0195561	0.0418572	0.219107	0.190977	-0.102781	-0.0230525	0.0611096	-0.0942727	0.055446	0.0754853	0.317292	0.098816	0.228768	0.0788995	0.0705667	-0.152593	-0.0284351	0.188165	-0.0277357	0.181888	-0.0970881	-0.152868	0.430174	-0.0343565	-0.0513705	-0.0142956	-0.195442	-0.0211132	-0.188053	-0.281459
TCGA-IB-AAUO-01A	CGclusterB	Normal	Abnormal	Dead	Female	<65	II	0.13817	-0.265879	-0.304757	-0.189139	-0.216541	-0.211216	-0.263112	-0.382372	-0.0568993	-0.208029	-0.307605	-0.190201	-0.257697	-0.0480702	0.293829	-0.38916	-0.171579	-0.242539	-0.255452	-0.402814	-0.192371	-0.294306	-0.172957	-0.144158	-0.13961	-0.195692	-0.116359	-0.21773	-0.256885	-0.303473	-0.209261	-0.324051	-0.225565	-0.283554	0.10924	-0.161293	-0.166327	-0.214046	0.00558039	-0.34451	-0.291652	-0.332436
TCGA-IB-AAUP-01A	CGclusterA	Normal	Normal	Live	Male	>=65	II	0.215022	0.130272	0.11063	0.0254217	0.185216	0.0796078	0.140914	-0.0755763	0.142951	0.244538	0.208652	0.0396457	-0.119505	-0.0121706	0.0827546	0.213453	0.206299	-0.209878	0.162189	0.183988	0.156231	0.172855	0.0992552	0.185097	0.169317	0.012653	0.195437	0.00234009	0.280629	0.107947	0.0284811	0.348425	0.180409	0.271239	0.282935	0.0189641	0.134673	-0.234826	0.14853	0.206584	-0.0817874	-0.00528923
TCGA-IB-AAUQ-01A	CGclusterB	Normal	Abnormal	Dead	Male	<65	II	0.0557804	-0.114066	-0.0157193	0.128287	-0.0891987	-0.0733127	-0.0575748	-0.124545	0.121873	-0.0229946	-0.232146	-0.326166	-0.310699	-0.0896254	-0.019721	0.170879	-0.299262	-0.221483	-0.254514	-0.179459	0.058621	-0.191864	-0.167032	0.0147609	-0.118027	-0.0121304	0.0704274	-0.0732942	-0.133434	-0.256527	-0.297159	0.36862	-0.269844	-0.278687	-0.177532	0.0124274	-0.0267427	0.100103	-0.311671	-0.183205	-0.290711	0.207277
TCGA-IB-AAUS-01A	CGclusterB	Normal	Normal	Live	Female	>=65	II	0.229735	-0.154222	0.194343	-0.121911	0.0705276	-0.0114657	0.0771785	-0.24564	-0.0989493	0.157235	0.0803902	-0.259295	-0.0160798	0.096953	-0.0708022	0.185802	0.0862378	-0.211505	0.00521411	0.0520664	0.182429	-0.0973263	-0.28878	0.0240116	-0.267145	-0.0598509	-0.0889482	-0.0331721	-0.00687533	0.0276211	-0.162993	0.398187	0.182203	0.150269	-0.286417	0.13241	-0.00421318	0.369832	0.221283	0.0868078	0.169844	0.362903
TCGA-IB-AAUT-01A	CGclusterA	Normal	Normal	Live	Male	>=65	II	0.183299	-0.0949445	0.0765161	0.0211492	0.0723667	-0.268485	0.0705493	-0.0466921	0.00284221	-0.0718289	-0.12013	-0.358506	0.0250303	0.171158	-0.352111	0.125516	0.00212137	0.104925	0.0443167	0.19744	0.122355	0.0885447	-0.372422	-0.134499	-0.356514	-0.033279	0.0847944	0.0225839	0.0948279	-0.0509102	0.0654428	0.253504	0.129755	0.0720343	-0.546435	-0.0728725	0.192456	-0.118582	-0.050638	0.223497	0.00759251	0.106142
TCGA-IB-AAUU-01A	CGclusterB	Abnormal	Abnormal	Live	Male	<65	II	0.205	-0.0246257	0.0935027	0.0334874	-0.00165347	0.369517	0.124632	0.0961058	-0.0280389	-0.123919	-0.0418444	0.0969433	0.148712	-0.0528	-0.0435461	-0.100765	-0.0727591	0.241899	0.0265158	0.142561	-0.0892716	-0.0781804	-0.0624131	0.00731778	0.126715	-0.148393	-0.126228	-0.00664531	-0.00384006	0.148071	0.0193055	-0.327353	-0.0193147	0.0635953	-0.13713	-0.207917	-0.0487916	0.0740922	0.25791	0.00418936	0.135809	-0.101327
TCGA-IB-AAUW-01A	CGclusterA	Normal	Normal	Dead	Female	<65	II	0.145131	-0.023533	0.0358971	-0.0413656	-0.0409938	-0.112343	-8.97e-05	0.14137	0.0153806	-0.197829	-0.052081	-0.0427186	0.00677155	-0.0731624	-0.296563	-0.0192123	0.055347	0.0388833	0.118316	0.0487447	0.151731	0.176018	-0.134716	-0.12763	-0.10035	-0.022278	-0.19041	0.049757	0.0522357	0.0571135	0.102578	-0.0893256	-0.00689089	-0.00473296	-0.422332	-0.0138363	0.0594324	-0.308668	0.1855	0.0834682	0.074001	-0.206554
TCGA-LB-A7SX-01A	CGclusterB	Abnormal	Normal	Dead	Female	>=65	II	0.0577162	-0.0537628	-0.286371	-0.137199	-0.195966	-0.38854	-0.308447	-0.383175	0.0718541	-0.375513	-0.260845	-0.383724	-0.238835	-0.360252	-0.215519	-0.45194	-0.266977	-0.252365	-0.190491	-0.281409	-0.247282	-0.241896	-0.0302361	-0.245059	-0.123645	-0.477742	0.0945336	-0.132153	-0.249911	-0.291339	-0.214253	-0.552149	-0.202587	-0.329817	0.137852	-0.431139	-0.0926226	-0.379464	-0.179067	-0.236054	-0.0117687	-0.403176
TCGA-LB-A8F3-01A	CGclusterB	Normal	Normal	Live	Female	<65	II	0.12665	-0.245455	-0.453086	-0.347411	-0.357048	-0.294568	-0.391032	-0.44935	-0.290892	-0.371639	-0.449876	-0.39237	-0.271772	-0.24848	-0.21291	-0.436921	-0.457459	-0.150999	-0.39658	-0.487427	-0.23214	-0.391481	-0.288991	-0.394818	-0.415418	-0.44658	-0.234337	-0.349539	-0.344376	-0.503953	-0.420802	-0.390506	-0.395303	-0.461653	-0.248379	-0.418443	-0.367686	-0.130114	-0.371969	-0.433439	-0.365167	0.235026
TCGA-LB-A9Q5-01A	CGclusterA	Normal	Normal	Dead	Female	<65	II	0.133782	-0.092115	0.131496	0.0881092	0.030771	-0.0572511	-0.00842725	-0.0114453	-0.180593	0.031385	0.0302934	-0.00609918	0.0871311	0.025274	-0.295761	0.166148	0.0708138	-0.0427348	-0.0468429	0.16476	0.149925	-0.00254154	0.0664422	0.0321698	-0.201993	-0.0758688	-0.13019	0.0519633	-0.0838609	0.163042	0.127323	0.229069	-0.0621705	0.0225566	-0.247056	-0.0123844	-0.127363	0.339127	0.0191441	0.0291107	0.285222	-0.0687319
TCGA-M8-A5N4-01A	CGclusterB	Abnormal	Normal	Live	Female	<65	II	0.0752384	0.043021	0.235358	0.114148	0.123208	0.376802	0.110887	0.262703	0.0964449	0.25236	0.0405369	0.0954222	0.174262	0.251465	0.0349325	0.224551	0.265195	0.211688	0.246048	0.0576387	0.0507701	-0.105869	-0.0495133	-0.00159254	-0.074982	0.186965	0.130934	0.0825363	0.111082	0.283016	0.0604437	0.203856	0.247945	0.0757181	-0.0241675	0.0862842	-0.00635555	0.35914	0.283603	0.101032	0.241161	0.133479
TCGA-OE-A75W-01A	CGclusterA	Abnormal	Abnormal	Dead	Male	>=65	II	-0.0206528	-0.347442	-0.3695	-0.267699	-0.355656	-0.363675	-0.335755	-0.499412	-0.265026	-0.433475	-0.423899	-0.412272	-0.255223	-0.142167	-0.0677167	-0.432482	-0.456653	-0.363238	-0.392165	-0.450139	-0.224378	-0.394144	-0.374894	-0.244912	-0.275916	-0.360904	-0.0818008	-0.355817	-0.381132	-0.416285	-0.45397	-0.377343	-0.121414	-0.429481	-0.154109	-0.344528	-0.330642	-0.0857374	-0.30127	-0.358315	-0.376356	-0.312977
TCGA-PZ-A5RE-01A	CGclusterB	Abnormal	Abnormal	Dead	Female	<65	II	0.188488	-0.202897	0.044426	-0.0331798	-0.102312	0.214305	-0.00719563	-0.131649	-0.0052814	-0.210042	-0.117723	-0.109261	0.111536	-0.0288071	-0.100672	-0.186356	-0.196283	0.0343618	-0.157354	-0.261427	-0.0415108	-0.181074	-0.29103	-0.128991	-0.216967	-0.155611	-0.0704333	-0.128228	-0.171313	-0.118933	-0.135127	-0.223599	0.00555779	-0.151238	-0.244062	-0.107945	-0.0422599	0.0173786	0.0666753	-0.114589	0.0336554	-0.00482975
TCGA-Q3-AA2A-01A	CGclusterA	Normal	Abnormal	Live	Female	<65	I	0.19305	-0.282062	-0.479261	-0.29929	-0.344563	-0.285819	-0.248896	-0.247533	-0.194407	-0.434603	-0.437644	-0.304286	-0.183465	-0.264978	0.200031	-0.360792	-0.263181	-0.0179158	-0.347256	-0.382947	-0.406862	-0.391473	-0.225273	-0.320316	-0.232424	-0.141907	-0.190609	-0.180541	-0.38701	-0.463746	-0.327574	-0.414842	-0.244687	-0.233177	-0.16815	0.0261292	-0.236242	-0.139244	-0.178119	-0.433625	-0.250178	-0.0906442
TCGA-RB-A7B8-01A	CGclusterB	Normal	Normal	Dead	Female	>=65	II	0.096683	-0.115754	-0.281142	-0.0697348	-0.0991712	0.0954631	-0.00223044	-0.180536	-0.0190623	-0.0335438	-0.167061	0.0787565	-0.152813	-0.19311	0.0758873	0.0963222	-0.0324285	-0.10527	-0.211893	-0.260846	-0.104346	0.05642	-0.329122	-0.373835	-0.362489	-0.0850939	0.109227	-0.203303	-0.192147	-0.229945	-0.260485	0.221558	-0.0769547	-0.160936	-0.323582	-0.0775408	0.00498027	-0.0642067	-0.148792	-0.361814	-0.243837	0.17532
TCGA-RB-AA9M-01A	CGclusterB	Normal	Normal	Live	Male	<65	II	0.144414	0.21382	0.299063	0.330254	0.259893	0.441873	0.200372	0.385546	0.165322	0.322915	0.0878063	0.2582	0.193679	0.216908	-0.000343813	0.209953	0.136454	0.362059	0.268173	0.210689	0.162371	0.293817	0.178308	0.112631	0.248862	0.219401	0.135282	-0.107498	0.153875	0.101975	0.0560901	0.0959946	-0.192154	0.219546	0.108809	0.0623366	0.149661	-0.270254	0.112151	0.0913167	0.229973	-0.0842896
TCGA-S4-A8RO-01A	CGclusterB	Abnormal	Abnormal	Live	Female	>=65	II	0.0319263	-0.17229	-0.199595	-0.365983	-0.198967	0.0873478	-0.155037	-0.274744	-0.0555001	-0.0262618	-0.0976608	0.0112836	-0.138046	0.0498041	0.108159	-0.259792	-0.0445423	-0.182239	-0.228511	-0.27808	-0.308886	-0.225334	0.0312734	0.0916968	0.165342	-0.158836	-0.283854	-0.0621969	-0.195298	-0.231658	-0.229173	-0.310107	-0.101949	-0.144061	0.374553	-0.18475	-0.231931	-0.232337	-0.15267	-0.181734	-0.136629	-0.414947
TCGA-S4-A8RP-01A	CGclusterA	Normal	Abnormal	Dead	Female	>=65	II	0.128314	-0.117293	-0.231954	-0.0970356	-0.00183769	0.3329	0.0639113	0.0603578	0.054731	-0.0163002	-0.155626	0.0866953	0.0235591	0.0142219	-0.216735	0.22679	-0.0562294	0.126363	-0.0649304	-0.0117538	-0.259856	0.0720695	-0.289572	-0.286323	-0.198127	0.229396	0.0724081	-0.0804722	-0.0297386	-0.094217	-0.0340461	0.272257	-0.0705981	-0.163827	-0.373099	0.0848291	0.132601	-0.28383	-0.110487	-0.120866	-0.138543	0.0751856
TCGA-US-A774-01A	CGclusterB	Normal	Normal	Dead	Female	>=65	II	0.0898241	0.0697101	0.243442	0.189342	0.234217	-0.0913023	0.206172	0.0327192	0.16425	0.245055	0.168059	-0.1245	0.0852183	0.0999867	-0.252871	0.317242	0.0652219	0.00948725	0.151653	-0.00225488	0.272995	0.25211	-0.123629	0.0299487	-0.135248	0.0701055	0.362935	0.0205763	0.169239	0.2341	0.177273	0.522822	0.111062	-0.0110432	-0.139891	0.0709368	0.0909287	0.487897	0.136213	0.21182	0.238369	0.374708
TCGA-US-A776-01A	CGclusterA	Normal	Normal	Live	Male	<65	II	0.126508	-0.354883	-0.347961	-0.476167	-0.429846	-0.297509	-0.425855	-0.379963	-0.44019	-0.351574	-0.296838	-0.291755	-0.352323	-0.325595	-0.131708	-0.536074	-0.343853	-0.374808	-0.317101	-0.382992	-0.403384	-0.315233	-0.0746287	-0.0956468	-0.143399	-0.435544	-0.565364	-0.27164	-0.293067	-0.386608	-0.328229	-0.638606	-0.440086	-0.316307	0.198403	-0.398511	-0.378735	-0.379593	-0.329603	-0.299688	-0.423284	-0.205429
TCGA-US-A779-01A	CGclusterA	Abnormal	Abnormal	Dead	Female	<65	II	-0.0521447	-0.240494	-0.395733	-0.220603	-0.317692	-0.291837	-0.294338	-0.354573	-0.232389	-0.454586	-0.351267	-0.320079	-0.203619	-0.393113	-0.330259	-0.486012	-0.339075	-0.125336	-0.378673	-0.376376	-0.418063	-0.447865	-0.234905	-0.346351	-0.260011	-0.458301	-0.255667	-0.225343	-0.485208	-0.361953	-0.338573	-0.579539	-0.184715	-0.404107	-0.34258	-0.394083	-0.173416	-0.178822	-0.241826	-0.341887	-0.246984	-0.446734
TCGA-US-A77E-01A	CGclusterB	Normal	Normal	Dead	Male	>=65	II	0.040192	0.0778671	-0.0641002	-0.0611998	-0.038253	-0.271526	-0.129797	0.20796	-0.0786214	0.000723663	-0.0569104	-0.184043	0.010372	0.133871	-0.0696853	0.0528085	-0.0217989	0.153378	0.020766	-0.0351037	-0.203144	0.134912	0.0606454	-0.168687	-0.154697	-0.0352969	0.0942605	0.0479392	-0.128258	-0.0155993	-0.12081	0.186413	0.0277274	-0.0122274	-0.341109	-0.144076	0.0179994	0.0891209	-0.0882544	-0.0715494	0.106377	0.119809
TCGA-US-A77G-01A	CGclusterA	Normal	Abnormal	Dead	Male	<65	II	0.00828412	-0.129021	0.0233323	-0.13927	-0.142531	-0.0296105	-0.157702	0.0408975	-0.314374	-0.0768635	-0.020846	0.00569753	-0.0188568	-0.0733665	0.0971649	-0.339988	0.00245656	-0.0582291	-0.0118748	0.0114482	-0.28841	-0.299998	0.0277197	-0.204957	-0.0351684	-0.251251	-0.265804	-0.0197734	-0.269053	0.0834483	-0.0159453	-0.494613	-0.00196637	-0.0899808	0.0874192	-0.310647	-0.191206	-0.136319	0.110041	-0.026105	-0.0328727	-0.380344
TCGA-XD-AAUH-01A	CGclusterB	Normal	Normal	Live	Female	<65	II	0.199822	0.156312	-0.079763	-0.00118723	0.0211491	-0.213138	0.0422283	0.044184	0.105752	-0.0636378	0.0290441	0.101372	0.00544693	-0.0902543	-0.24502	0.146108	0.123012	0.0478407	-0.0388373	0.125936	0.0389031	0.249868	-0.0905514	-0.0240933	0.00859938	0.136192	-0.0832413	0.132496	0.158268	-0.0190493	0.0534377	0.015612	0.0620804	0.213722	-0.380409	0.140572	0.0800823	-0.174223	0.0513896	-0.00167661	0.125083	0.159351
TCGA-XD-AAUI-01A	CGclusterB	Abnormal	Abnormal	Dead	Female	<65	II	0.176558	0.00635207	0.235369	0.078211	0.147023	0.388032	0.212009	0.0547918	-0.0116955	0.311141	0.132333	0.282501	0.0656774	0.435858	0.160983	0.204558	0.262158	0.155348	0.0703218	0.212076	0.250315	-0.137255	-0.188584	0.15229	0.177821	0.331422	0.00376765	0.247428	0.21389	0.0920371	0.0352029	0.253307	0.329489	0.202179	0.236144	0.33923	0.063684	0.0581498	0.240913	0.170449	0.161923	-0.334273
TCGA-XD-AAUL-01A	CGclusterB	Abnormal	Abnormal	Live	Male	<65	II	0.13761	0.108751	0.313983	0.242323	0.169324	0.443742	0.30759	0.404618	0.076771	0.322998	0.196771	0.219961	0.237791	0.117459	-0.178258	0.379134	0.298809	0.34267	0.281055	0.178435	0.183585	0.157793	0.00377262	0.121454	0.0390217	0.355952	0.282024	0.182965	0.106359	0.45714	0.211138	0.406306	0.199019	0.224013	-0.336605	0.227988	0.0873114	0.474323	0.186768	0.28542	0.288732	0.388105
TCGA-XN-A8T3-01A	CGclusterB	Abnormal	Abnormal	Live	Male	>=65	I	0.0932438	-0.00318635	0.0877525	0.0605231	0.143809	0.267851	0.24226	0.0561856	0.0370971	0.175537	0.146015	-0.0192468	-0.14051	0.00275792	0.194054	0.35095	-0.0185938	-0.00877931	0.200966	0.291086	0.175501	0.0808758	0.111864	0.164142	0.103356	0.0489512	0.21888	0.0864604	0.136378	0.139687	-0.0188783	0.375617	-0.0468779	0.137421	0.263756	-0.109148	-0.0225789	0.278121	-0.055718	0.110115	-0.175476	0.291822
TCGA-YB-A89D-01A	CGclusterB	Normal	Abnormal	Live	Male	<65	II	0.134967	0.20548	0.142974	0.370624	0.25837	0.227833	0.320925	0.209195	0.312574	0.0219216	0.0956095	-0.0360862	0.247435	0.0940358	-0.17581	0.356334	0.0349583	0.310779	0.116529	0.286061	0.184879	0.347977	-0.354572	-0.187039	-0.257047	0.434926	0.38633	-0.0152878	0.00720997	-0.0213065	0.102396	0.462963	0.0104086	0.0851776	-0.376636	0.36555	0.340896	0.263099	0.0729865	-0.0730374	0.347122	0.346637
TCGA-YH-A8SY-01A	CGclusterB	Abnormal	Abnormal	Live	Female	>=65	NA	0.146458	-0.0170137	-0.0104254	0.114563	0.0643115	0.0528418	-0.0206002	-0.0265133	0.199255	0.117421	-0.220785	-0.0668225	-0.0287315	-0.0371861	0.199962	0.109689	-0.128435	0.102729	-0.0596327	-0.188352	0.024922	-0.069422	0.0224098	-0.144729	-0.065968	0.0780256	0.201599	-0.266334	-0.0950107	-0.355982	-0.167448	0.307962	0.0173891	-0.118374	0.137063	0.0804105	-0.0201775	0.4158	-0.122449	-0.39306	0.0899447	0.38315
TCGA-YY-A8LH-01A	CGclusterA	Normal	Abnormal	Live	Female	<65	II	0.0481522	-0.224498	-0.250938	-0.30787	-0.288022	-0.154106	-0.396108	-0.330304	-0.22309	-0.251231	-0.357862	-0.18293	-0.15203	-0.0883965	0.078261	-0.485855	-0.209863	-0.144679	-0.269045	-0.341189	-0.401533	-0.396675	-0.215241	-0.31437	-0.217486	-0.339235	-0.282573	-0.237278	-0.239909	-0.308163	-0.289393	-0.586752	-0.0954668	-0.329204	-0.209328	-0.290472	-0.233585	-0.0455806	-0.0347328	-0.315411	-0.154857	-0.428341
[truncated: 18 more columns]

## Sheet: Table SIII
Table SIII. The 224 cuproptosis subtype-related DEGs in TCGA cohort.
gene	conMean	treatMean	logFC	pValue	fdr
ACTL6B	0.829783	0.351652	-1.23858	0.00571049	0.0212624
AL133325.3	1.02381	0.444948	-1.20224	0.00314688	0.0135844
TRPC7-AS1	0.735427	0.330799	-1.15263	0.002077	0.0100173
WNK4	1.09788	0.501175	-1.13134	4.55e-05	0.000598133
KCNH6	1.06076	0.486645	-1.12416	0.00291104	0.0128123
GPC5-AS1	0.849304	0.408388	-1.05634	0.00344598	0.0145328
RIPPLY2	0.774065	0.373162	-1.05265	0.00192962	0.00948914
NR0B1	0.820619	0.398421	-1.04242	0.00102569	0.00594718
LINC02106	0.723165	0.354757	-1.02749	0.000632852	0.00415306
CAMK2B	1.1042	0.547882	-1.01107	0.00158166	0.00821015
TTLL6	0.824185	0.410985	-1.00388	3.23e-05	0.00046431
AC129507.3	0.709704	0.358419	-0.985569	0.000336071	0.00257651
AC106795.2	1.18414	0.613357	-0.949047	1.67e-06	5.4e-05
AC120498.10	0.736239	0.381577	-0.948201	0.0176288	0.0491482
ARX	1.35209	0.706063	-0.937319	0.000250766	0.00206957
AC064807.2	0.842578	0.441991	-0.930792	2.69e-05	0.000404217
SMIM32	1.84785	0.982749	-0.910951	7.58e-05	0.000852406
AC129507.2	1.09796	0.585257	-0.907687	3.11e-05	0.000452623
CALY	1.6035	0.861461	-0.896367	0.00237455	0.0110257
SNTG2-AS1	0.691012	0.372749	-0.890507	0.000330894	0.00256183
NPW	0.794287	0.431715	-0.879582	0.000136437	0.00132143
PRLR	0.756267	0.411364	-0.878479	0.00456901	0.0179689
LINC01976	0.69097	0.377029	-0.873949	0.0146851	0.0428352
AP000892.2	0.80944	0.442836	-0.870153	0.000112733	0.00114641
AL359513.1	0.90414	0.496076	-0.865985	1.89e-05	0.000316503
MIR339	0.727308	0.399696	-0.863665	0.000162564	0.00150466
ACMSD	0.731557	0.403071	-0.859934	0.0138538	0.0410225
KCNJ3	0.973489	0.537581	-0.856682	0.00103934	0.00600215
SPTBN4	0.697631	0.389386	-0.841265	0.0119837	0.0367528
FBLL1	1.2585	0.702752	-0.840618	0.00177882	0.0089538
ASPDH	0.881277	0.494567	-0.833429	0.00154472	0.00806178
AP3B2	0.700549	0.393382	-0.832557	0.00497837	0.0192361
AMH	1.13412	0.638322	-0.829216	8.75e-05	0.000951949
RUNDC3A	1.51993	0.862149	-0.817992	0.00508576	0.0194998
RDH12	1.00618	0.571628	-0.815744	0.000490245	0.00341602
CACNA1A	1.06069	0.605506	-0.808789	0.00442353	0.0175803
TPSG1	1.18351	0.676394	-0.807133	0.0037986	0.0156566
AC009407.1	1.23947	0.714099	-0.795523	1.17e-05	0.000224962
AC006369.1	1.06263	0.613914	-0.791537	0.00115494	0.00651149
ZDHHC8P1	1.21818	0.704924	-0.789182	0.00165797	0.00851475
LINC01431	0.659374	0.382994	-0.783775	3.07e-06	8.51e-05
AC112184.1	0.66018	0.386521	-0.772314	0.000296337	0.00236091
PTGDR2	0.878701	0.51535	-0.76982	0.000141282	0.00135225
CCDC188	0.777982	0.456355	-0.76958	0.00837785	0.0281472
AC009318.4	0.671133	0.394158	-0.767824	2.66e-06	7.77e-05
CELF3	1.5994	0.939497	-0.767568	0.0119837	0.0367528
TRPM5	0.921555	0.542437	-0.764615	0.0143941	0.0421539
AL121929.2	1.1126	0.656745	-0.760533	4.76e-05	0.000613233
LINC00261	2.50229	1.47962	-0.758021	1.37e-05	0.000249895
Z97653.1	0.733004	0.433718	-0.757066	0.0133277	0.0398577
AC104785.1	0.665201	0.397391	-0.74323	8.76e-06	0.00018241
ATP6V0E2-AS1	0.843348	0.50419	-0.742161	0.00105208	0.00604635
FOXP4-AS1	0.750467	0.449467	-0.739572	1.48e-06	4.95e-05
AC008808.2	0.828589	0.497578	-0.735734	0.00689155	0.024435
AL121583.1	0.787301	0.474151	-0.731567	3.57e-06	9.46e-05
PACSIN1	0.679596	0.410504	-0.727282	0.00281464	0.0125052
INSM1	1.71987	1.04282	-0.721809	0.00756559	0.0260602
RNU6-833P	0.810377	0.49312	-0.716653	0.00304967	0.0132708
DUSP15	0.642048	0.391833	-0.712441	0.00301062	0.013149
SGSM1	0.975789	0.59667	-0.709636	9.26e-05	0.000993136
SLC16A11	1.16954	0.715437	-0.709042	2.11e-05	0.000340032
AC087752.3	0.649862	0.398065	-0.70713	0.000210422	0.00182208
RIC3	0.904381	0.554283	-0.706307	0.00525078	0.0199592
KCNH3	0.739825	0.453544	-0.70594	0.00648018	0.0233129
NKX2-2	2.23418	1.372	-0.70346	0.00454417	0.0179123
HEPACAM2	2.09999	1.28997	-0.703044	0.00394679	0.0161639
OGDHL	1.21567	0.74791	-0.700813	0.00497837	0.0192361
MCOLN3	0.868378	0.535566	-0.69726	0.00173767	0.0088098
TAGLN3	1.38854	0.858514	-0.693654	0.00589804	0.0217453
AL008582.1	0.769143	0.476978	-0.689331	4.97e-06	0.000119956
AC010478.1	0.714413	0.444055	-0.686021	0.00476971	0.0185879
AC005076.1	0.81784	0.51084	-0.678948	9.26e-05	0.000993136
TCEAL2	1.82848	1.143	-0.677812	0.00665077	0.0238268
CCDC154	0.63848	0.400417	-0.673139	3.23e-05	0.00046431
AC080129.2	0.755927	0.474204	-0.67274	0.000564241	0.00378059
SSTR5-AS1	1.10872	0.695966	-0.671799	0.0170624	0.0479586
MIR3677	1.07716	0.677745	-0.668422	9e-05	0.00097198
REM2	0.687973	0.432879	-0.668389	1.37e-05	0.000249895
CDHR3	0.805108	0.506649	-0.668196	0.00634652	0.0229551
DDC	2.2166	1.39763	-0.665366	0.000199284	0.00175515
AC092117.1	0.710464	0.448286	-0.66434	0.000219156	0.00188189
AC005911.1	0.78168	0.494163	-0.66159	2.5e-05	0.000381657
AL590326.1	0.969687	0.614368	-0.658416	7.35e-05	0.000837339
A1CF	1.10672	0.701513	-0.657755	0.000773227	0.00482229
ANKRD24	0.814478	0.516699	-0.656551	3.07e-06	8.51e-05
AC125494.2	0.836642	0.531156	-0.655476	5.65e-08	4.43e-06
STIM2-AS1	0.666873	0.423643	-0.654564	3.28e-05	0.00046743
NEURL1	2.28684	1.45472	-0.652609	0.000139331	0.00134105
RAB26	2.48789	1.58489	-0.650533	5.65e-07	2.42e-05
MAT1A	0.828182	0.52821	-0.648837	0.00693218	0.0245559
AC063948.1	0.909493	0.580659	-0.647372	1.23e-06	4.26e-05
AC002059.1	0.633658	0.404603	-0.647197	0.000864422	0.00524173
SYP	1.9264	1.23141	-0.645603	0.00142162	0.00755979
CFAP70	0.70637	0.453335	-0.639847	0.00177882	0.0089538
AC104463.2	0.755009	0.485221	-0.637851	8.08e-06	0.000172071
AC095057.3	1.09904	0.70899	-0.632403	1.19e-07	7.52e-06
AC069224.1	0.706667	0.456135	-0.631569	5.39e-06	0.000126626
AC000068.2	0.648537	0.419212	-0.629506	3.57e-06	9.46e-05
AL136304.1	0.76535	0.495245	-0.627979	1.65e-05	0.000284858
AL121601.1	0.689289	0.446266	-0.627204	0.000199275	0.00175515
AP000757.2	1.1693	0.757644	-0.62605	0.00507106	0.0194998
HNF1A-AS1	1.91111	1.23898	-0.625264	1.42e-05	0.000258344
RPS14P8	0.973828	0.631725	-0.624371	0.00419312	0.0169303
CACNA2D2	1.75734	1.1407	-0.623477	0.00193001	0.00948914
CRYM	0.858007	0.558722	-0.618859	0.00608663	0.0222389
AP000757.1	1.0667	0.695594	-0.616839	0.00177882	0.0089538
CXXC4	1.15594	0.754427	-0.61562	0.00202162	0.00981768
AC005393.1	0.815314	0.533079	-0.613005	1.98e-05	0.000325855
RPL39P38	0.827744	0.542155	-0.61048	0.000372503	0.00279409
AL118558.4	1.01687	0.666096	-0.610335	5.31e-06	0.000125527
AC068620.2	0.707053	0.463294	-0.609889	1.48e-05	0.000264906
AC124016.2	1.13099	0.741786	-0.608513	1.92e-05	0.000320388
AL356740.1	0.711152	0.467945	-0.603819	0.00199834	0.00972914
SH2D6	0.823983	0.543478	-0.600394	0.0130769	0.0392713
RNU6-1136P	0.62548	0.412636	-0.600094	0.00120058	0.00669436
CDC42P6	0.3942	0.598382	0.602141	0.000114544	0.00115961
LINC01819	1.24238	1.88746	0.603339	0.00332799	0.0141473
NTSR1	0.917761	1.39601	0.605116	0.00080263	0.00493985
AP003555.3	0.769889	1.17684	0.612193	0.000207397	0.00180459
NPTX1	1.13808	1.74017	0.612622	8.09e-06	0.000172071
ANOS1	0.892396	1.36474	0.612869	7.5e-07	3.03e-05
PCDH7	1.61301	2.46793	0.613543	1.73e-09	4.18e-07
HMCN1	0.978825	1.49906	0.614935	1.27e-06	4.38e-05
AF201337.1	0.80641	1.23763	0.617998	2.54e-09	5.37e-07
ABALON	0.491467	0.754619	0.618656	3.62e-08	3.16e-06
MUC4	1.34782	2.07023	0.619168	0.000153539	0.00144274
SCUBE3	0.815231	1.25298	0.62008	0.000496587	0.00344931
AC005392.2	0.554373	0.853187	0.622004	0.0139301	0.0412403
TNNT1	1.22604	1.88769	0.622616	0.00137169	0.00736012
MALL	1.60887	2.48203	0.625467	9.12e-08	6.18e-06
KLK7	2.62875	4.06204	0.627826	3.53e-05	0.000494698
NDP	0.552433	0.854212	0.628795	7.11e-05	0.000816065
ZBED2	0.970772	1.503	0.630639	5.84e-05	0.00070652
DKK1	2.10974	3.27863	0.636027	1.28e-05	0.000240374
ADAM12	1.58552	2.46519	0.636738	9.94e-07	3.72e-05
FGFBP1	1.81932	2.82919	0.636991	4.29e-05	0.00057299
VGLL3	1.11051	1.72729	0.63729	2.59e-07	1.33e-05
UPK2	0.541511	0.845173	0.642255	0.001052	0.00604635
RAET1L	0.760294	1.18858	0.644615	0.000111297	0.0011371
RNU6-1161P	0.685019	1.07138	0.645256	0.00331182	0.0141212
AC114296.1	0.472704	0.739662	0.64593	0.0121171	0.0370884
COL11A1	2.64038	4.1331	0.646476	2.59e-07	1.33e-05
WNT5A-AS1	0.686054	1.07452	0.647294	1.06e-05	0.000209816
SCEL	1.68983	2.65059	0.649442	3.23e-06	8.77e-05
ZNF469	1.07959	1.69511	0.650897	9.33e-09	1.3e-06
ZNF365	0.704009	1.10628	0.652048	1.09e-05	0.000214379
HIST1H2AI	0.479532	0.755139	0.655114	0.000442115	0.00316817
UCN2	0.52062	0.821004	0.65716	9e-05	0.00097198
ADAMTS12	1.79282	2.82896	0.658044	6.14e-11	5.64e-08
C10orf55	0.441296	0.697424	0.660289	2.02e-06	6.24e-05
ANKRD1	0.963726	1.52743	0.664415	0.00025761	0.00211568
AP001434.1	0.40964	0.649601	0.665198	0.00142918	0.00759738
IGLON5	0.406518	0.644926	0.665814	5.35e-05	0.000665378
Z98257.1	0.896885	1.43798	0.681049	0.000173806	0.00158038
KRT6A	2.1854	3.50489	0.681473	2.17e-05	0.000345585
ANXA8L1	0.557182	0.893645	0.681554	2.86e-05	0.00042454
LDHAP7	0.571561	0.921799	0.689546	5.19e-05	0.000649794
HMGA2	0.483626	0.780123	0.689809	0.000275433	0.0022242
AC015660.1	0.511542	0.825211	0.689909	3.17e-05	0.000459082
LINC01050	0.391492	0.632208	0.691417	8.61e-05	0.000943094
APCDD1L	0.672618	1.08634	0.691618	0.00028288	0.00227009
COX6B2	1.00164	1.62098	0.6945	2.11e-05	0.000340032
LINC01614	1.71765	2.78435	0.696906	4.66e-08	3.75e-06
BEAN1	0.795927	1.29074	0.697485	1.53e-06	5.08e-05
CD300E	0.586035	0.951414	0.699086	7.16e-05	0.00082016
CORIN	0.594287	0.967955	0.703779	1.73e-06	5.52e-05
DSG3	0.933399	1.52029	0.703781	0.000108259	0.00111729
ST6GAL2	0.503874	0.822621	0.707165	7.22e-06	0.000159216
SYNC	0.584064	0.953605	0.707265	3.47e-07	1.68e-05
UCA1	1.849	3.03488	0.714897	1.75e-05	0.000299089
NMUR2	0.777993	1.27929	0.717518	0.00212485	0.010194
GPR87	1.37442	2.2649	0.720621	2.42e-05	0.000373518
FPR2	0.417083	0.688004	0.722083	0.00126898	0.00696385
AC022149.1	0.740104	1.22346	0.725166	6.33e-09	1.04e-06
KLK6	2.84147	4.72941	0.735022	3.62e-08	3.16e-06
SPATA20P1	0.473451	0.78833	0.735584	4.89e-05	0.000623775
SPOCD1	0.722278	1.20504	0.738459	2.64e-07	1.35e-05
LINC01561	0.381777	0.637837	0.740458	3.57e-06	9.46e-05
TGFB2-AS1	0.818022	1.36854	0.742422	4.97e-06	0.000119956
AC245041.1	1.0035	1.67977	0.743219	5.46e-06	0.00012807
IGFL1P1	0.663435	1.11328	0.746789	0.000807779	0.00496956
LINC01436	0.595326	0.999006	0.746813	0.000304339	0.00240852
PAPPA	0.566752	0.956462	0.754989	7.83e-08	5.6e-06
MMP13	0.643349	1.08728	0.75705	4.97e-05	0.000631467
ANXA8	0.962391	1.62725	0.757741	4.81e-06	0.000117366
LSAMP-AS1	0.443397	0.750003	0.758298	0.0141481	0.0416542
FAM83A	1.56623	2.65634	0.762141	5.65e-07	2.42e-05
AC007785.1	0.461388	0.783724	0.764366	0.000981583	0.00576559
XIRP1	0.43929	0.748447	0.768727	7.58e-05	0.000852406
FAM83A-AS1	0.598449	1.02058	0.770092	1.77e-05	0.000301429
LINC00578	0.648381	1.10852	0.773721	3.87e-07	1.82e-05
GSDMC	0.427053	0.730312	0.774096	1.22e-05	0.000231532
AC009093.1	0.576821	0.986682	0.77446	3.35e-08	3.02e-06
IGFL3	0.520248	0.892321	0.778363	0.00278738	0.0124162
GPR1	0.432683	0.743923	0.781844	1.61e-06	5.25e-05
KRT81	0.757399	1.30589	0.785912	0.00384042	0.015791
AP001542.1	0.696128	1.20368	0.790028	5.06e-05	0.000640061
C6orf15	0.707969	1.22573	0.791887	0.000133765	0.00130044
AC011352.3	0.432914	0.751949	0.796554	1.07e-05	0.000210698
PADI1	1.89508	3.29322	0.797242	7.46e-06	0.00016327
RNU6-26P	0.493486	0.858624	0.799018	7.91e-05	0.000880999
KLK8	1.32715	2.32113	0.806496	1.62e-05	0.000281408
RNU6-403P	0.902543	1.57901	0.806949	2.07e-06	6.36e-05
HHIP	0.469432	0.826429	0.815974	9.34e-06	0.000191101
IGF2BP3	0.5114	0.913455	0.836881	1.89e-05	0.000316503
IL11	0.82899	1.48199	0.838107	1.29e-08	1.65e-06
LINC01705	0.990431	1.78414	0.849105	1.14e-07	7.34e-06
IGFL2-AS1	0.587393	1.06023	0.851978	0.000631901	0.00415306
KANK4	0.733963	1.32845	0.855961	1.21e-07	7.64e-06
CYP24A1	0.422521	0.769308	0.86454	0.00983656	0.0318328
A2ML1	0.484824	0.884103	0.866752	0.000222142	0.00189699
ALPP	0.513029	0.938566	0.871416	0.000401057	0.00295306
BARX1	0.441522	0.810346	0.876054	0.00304438	0.0132519
EPYC	0.924963	1.70749	0.884405	6.61e-05	0.000777878
PPBP	0.466572	0.918602	0.977342	0.0172798	0.0484286
MUC16	0.671088	1.33233	0.989378	2.16e-06	6.55e-05
LINC02257	0.339913	0.678417	0.997008	4.35e-07	2e-05
EREG	0.703424	1.42594	1.01945	5.95e-06	0.000136522
CLDN6	0.409751	0.839906	1.03548	0.00940655	0.0308716
PADI3	0.356457	0.745567	1.06461	2.6e-05	0.000393621
AL161431.1	0.481801	1.08709	1.17396	1.18e-05	0.000227407
IGFL1	0.590504	1.37233	1.21661	0.00241855	0.0111996
IBSP	0.443207	1.09003	1.29832	1.15e-07	7.37e-06
KLK5	0.325977	0.849168	1.38128	0.000148406	0.00140994

## Sheet:  Table SIV
Table SIV. The 161 cuproptosis subtype-related DEGs related to OS time in TCGA cohort.
id	coef	HR	HR.95L	HR.95H	pvalue
ACTL6B	-0.477412	0.620387	0.4497	0.855858	0.00363648
AL133325.3	-0.474326	0.622304	0.467829	0.827787	0.00112104
TRPC7-AS1	-0.563746	0.569074	0.398914	0.811816	0.00186999
WNK4	-0.599333	0.549178	0.38645	0.780428	0.000829845
KCNH6	-0.464088	0.628708	0.471823	0.83776	0.00153167
RIPPLY2	-0.555001	0.574072	0.408938	0.80589	0.00134138
NR0B1	-0.351314	0.703763	0.525177	0.943076	0.0186525
LINC02106	-0.391138	0.676287	0.488799	0.935688	0.0182132
CAMK2B	-0.415866	0.659769	0.49149	0.885664	0.00563726
TTLL6	-0.664035	0.51477	0.348966	0.759352	0.000814231
AC129507.3	-0.486119	0.615009	0.419629	0.901358	0.0126868
AC106795.2	-0.394418	0.674072	0.502884	0.903535	0.0083253
AC120498.10	-0.519733	0.59468	0.401716	0.880333	0.00941022
ARX	-0.346991	0.706812	0.547644	0.912241	0.00768598
AC064807.2	-0.397883	0.671741	0.480721	0.938666	0.0197669
SMIM32	-0.429007	0.651155	0.49884	0.849977	0.00160184
AC129507.2	-0.320656	0.725673	0.532141	0.989589	0.0427557
CALY	-0.417098	0.658957	0.513137	0.846215	0.00108129
SNTG2-AS1	-0.373133	0.688574	0.492537	0.962636	0.0290563
NPW	-0.388705	0.677934	0.477721	0.962058	0.0295137
PRLR	-0.809477	0.445091	0.289308	0.684757	0.00023059
LINC01976	-0.3201	0.726076	0.530276	0.994174	0.0458901
AP000892.2	-0.56686	0.567304	0.395029	0.81471	0.002143
AL359513.1	-0.540841	0.582258	0.384569	0.881571	0.0106014
KCNJ3	-0.474614	0.622125	0.454059	0.852399	0.00313779
SPTBN4	-0.758304	0.46846	0.293689	0.747236	0.00145748
FBLL1	-0.521194	0.593811	0.428771	0.822379	0.00170705
ASPDH	-0.653891	0.520018	0.340172	0.794947	0.00253012
AP3B2	-0.624632	0.535459	0.35757	0.801845	0.00243019
AMH	-0.319781	0.726308	0.545706	0.966681	0.0283598
RUNDC3A	-0.464248	0.628608	0.470303	0.840198	0.00171144
CACNA1A	-0.613045	0.541699	0.370861	0.791234	0.0015177
AC009407.1	-0.595661	0.551198	0.397793	0.763762	0.000344349
AC006369.1	-0.437219	0.64583	0.478183	0.872253	0.0043543
ZDHHC8P1	-0.531312	0.587833	0.419036	0.824625	0.0020944
LINC01431	-0.946826	0.38797	0.228488	0.658771	0.000456492
AC112184.1	-0.983427	0.374027	0.229456	0.609687	7.9877e-05
PTGDR2	-0.471779	0.623891	0.438715	0.887228	0.00864042
CCDC188	-1.07626	0.340869	0.197794	0.587439	0.000106331
AC009318.4	-0.675311	0.508998	0.321415	0.806058	0.00398732
CELF3	-0.372663	0.688897	0.541622	0.876219	0.00239158
AL121929.2	-0.395578	0.673291	0.492404	0.920627	0.0132113
LINC00261	-0.318006	0.727599	0.566553	0.934422	0.0127261
Z97653.1	-0.56659	0.567457	0.384405	0.837679	0.00435407
AC104785.1	-0.485892	0.615148	0.378984	0.998478	0.0492837
ATP6V0E2-AS1	-0.904939	0.404566	0.247817	0.660462	0.000295998
FOXP4-AS1	-0.553392	0.574996	0.372297	0.888055	0.0125854
AC008808.2	-0.455984	0.633824	0.451502	0.889769	0.00841779
AL121583.1	-0.969252	0.379367	0.23291	0.617918	9.86047e-05
PACSIN1	-0.619395	0.53827	0.349563	0.828848	0.00491929
INSM1	-0.353124	0.70249	0.552762	0.892776	0.00388498
RNU6-833P	-0.438092	0.645267	0.464793	0.895816	0.00886417
DUSP15	-1.05602	0.347839	0.187276	0.646062	0.000829178
SGSM1	-0.660781	0.516448	0.333194	0.800489	0.00312482
SLC16A11	-0.648901	0.52262	0.355293	0.768749	0.000981956
AC087752.3	-0.854059	0.425684	0.247573	0.731931	0.00201184
RIC3	-0.54436	0.580213	0.41073	0.819631	0.00201218
KCNH3	-0.765468	0.465116	0.289844	0.746377	0.00151267
NKX2-2	-0.259509	0.77143	0.628497	0.94687	0.0130596
OGDHL	-0.435339	0.647046	0.486193	0.861115	0.00283246
MCOLN3	-0.580661	0.559528	0.379948	0.823986	0.00327887
TAGLN3	-0.301804	0.739483	0.569553	0.960113	0.0234812
AL008582.1	-0.66202	0.515808	0.325188	0.818166	0.00491438
AC010478.1	-0.846506	0.428911	0.264573	0.695325	0.000594513
AC005076.1	-0.905463	0.404355	0.240273	0.680486	0.000650915
TCEAL2	-0.341905	0.710415	0.554633	0.909953	0.00678755
CCDC154	-0.960335	0.382765	0.22373	0.654847	0.000456277
AC080129.2	-0.61142	0.54258	0.349248	0.842932	0.00652543
MIR3677	-0.531933	0.587468	0.435061	0.793265	0.000517848
REM2	-1.15744	0.31429	0.174095	0.56738	0.000122865
CDHR3	-0.725001	0.484324	0.285291	0.822211	0.00725467
DDC	-0.319653	0.726401	0.568644	0.927923	0.0105041
AC092117.1	-0.756623	0.469248	0.277075	0.794708	0.00488085
AC005911.1	-0.612686	0.541894	0.339321	0.865401	0.0103109
AL590326.1	-0.553491	0.574939	0.408115	0.809955	0.00154882
A1CF	-0.294797	0.744683	0.554829	0.999502	0.0496134
ANKRD24	-0.585922	0.556593	0.326869	0.947767	0.0309664
AC125494.2	-1.17273	0.309519	0.173292	0.552837	7.41144e-05
STIM2-AS1	-0.668258	0.512601	0.32793	0.801266	0.00336666
NEURL1	-0.322268	0.724504	0.55605	0.94399	0.0169926
RAB26	-0.355623	0.700737	0.501599	0.978934	0.0370891
AC063948.1	-0.777312	0.45964	0.283578	0.745013	0.0016076
AC002059.1	-0.677688	0.50779	0.314145	0.8208	0.00567572
SYP	-0.505797	0.603025	0.444159	0.818714	0.0011867
CFAP70	-0.768942	0.463503	0.27657	0.776785	0.00351434
AC095057.3	-1.00557	0.365838	0.219962	0.608456	0.000107036
AC069224.1	-1.03798	0.354171	0.19596	0.640116	0.000587688
AL136304.1	-0.738141	0.478002	0.283522	0.805882	0.00560911
AL121601.1	-0.635594	0.529621	0.33303	0.842262	0.00724879
HNF1A-AS1	-0.326363	0.721543	0.523488	0.994531	0.0462107
CACNA2D2	-0.593567	0.552354	0.388957	0.784391	0.000909573
AP000757.1	-0.390382	0.676798	0.488629	0.937432	0.0188395
CXXC4	-0.576764	0.561713	0.379309	0.831834	0.00398867
AC005393.1	-0.869118	0.419321	0.25017	0.702842	0.000973498
AL118558.4	-0.910431	0.402351	0.237864	0.680584	0.000686716
AC068620.2	-1.37738	0.252238	0.138941	0.457919	5.97905e-06
AC124016.2	-0.660052	0.516824	0.324674	0.822696	0.00538915
AL356740.1	-0.848458	0.428074	0.261257	0.701407	0.000757949
AP003555.3	0.389896	1.47683	1.08139	2.01687	0.0142049
NPTX1	0.323558	1.38204	1.01801	1.87623	0.038041
PCDH7	0.401092	1.49345	1.01263	2.20258	0.0430427
AF201337.1	0.773834	2.16806	1.26571	3.71371	0.00483112
ABALON	0.66464	1.94379	1.1158	3.38621	0.0189327
MUC4	0.306861	1.35915	1.07131	1.72433	0.0114945
AC005392.2	0.314043	1.36895	1.02535	1.82769	0.0331928
TNNT1	0.342337	1.40824	1.13039	1.75438	0.00226605
MALL	0.578722	1.78376	1.24173	2.5624	0.00173945
KLK7	0.402527	1.4956	1.19735	1.86815	0.000389537
ZBED2	0.443878	1.55874	1.20451	2.01714	0.000739155
DKK1	0.538471	1.71339	1.30261	2.25369	0.000117932
FGFBP1	0.510357	1.66589	1.28636	2.15738	0.000109297
UPK2	0.446854	1.56339	1.23379	1.98103	0.000216334
RAET1L	0.272311	1.313	1.00217	1.72022	0.048187
RNU6-1161P	0.400368	1.49237	1.1285	1.97356	0.00498816
COL11A1	0.283615	1.32792	1.03513	1.70353	0.0256392
SCEL	0.507421	1.661	1.2479	2.21085	0.000505385
HIST1H2AI	0.508245	1.66237	1.2066	2.29029	0.00187902
UCN2	0.417037	1.51746	1.08927	2.11397	0.0136837
ADAMTS12	0.490769	1.63357	1.12446	2.3732	0.0100079
C10orf55	0.723659	2.06196	1.28824	3.30038	0.00256702
Z98257.1	0.275728	1.31749	1.04481	1.66134	0.0197827
KRT6A	0.310308	1.36384	1.12381	1.65514	0.00167899
ANXA8L1	0.531528	1.70153	1.26105	2.29588	0.000506345
LDHAP7	0.691901	1.99751	1.37214	2.9079	0.000304819
HMGA2	0.505819	1.65834	1.25952	2.18346	0.000313515
AC015660.1	0.562199	1.75453	1.28793	2.39017	0.000365131
COX6B2	0.349148	1.41786	1.08983	1.84463	0.00930371
LINC01614	0.280872	1.32428	1.00658	1.74227	0.0447696
BEAN1	0.452327	1.57197	1.11681	2.21262	0.00950413
DSG3	0.361235	1.4351	1.16274	1.77126	0.000767773
UCA1	0.561395	1.75312	1.34881	2.27861	2.70563e-05
GPR87	0.49587	1.64193	1.30461	2.06646	2.37642e-05
AC022149.1	0.618364	1.85589	1.16535	2.9556	0.00920108
KLK6	0.417726	1.5185	1.1913	1.93558	0.000741709
AC245041.1	0.532069	1.70245	1.27839	2.26717	0.000272259
MMP13	0.24638	1.27939	1.00085	1.63544	0.0492143
ANXA8	0.395554	1.48521	1.16304	1.89662	0.00152124
FAM83A	0.605168	1.83156	1.43016	2.34563	1.62991e-06
FAM83A-AS1	0.504473	1.65611	1.30466	2.10224	3.39531e-05
GSDMC	0.557164	1.74571	1.24442	2.44895	0.00125491
IGFL3	0.339636	1.40444	1.10033	1.7926	0.00637506
GPR1	0.500075	1.64884	1.12225	2.42254	0.0108502
AC011352.3	0.389098	1.47565	1.03039	2.11331	0.0337244
PADI1	0.309516	1.36277	1.12058	1.6573	0.00193334
RNU6-26P	0.546426	1.72707	1.27602	2.33755	0.000402642
KLK8	0.361526	1.43552	1.1613	1.77449	0.000830177
RNU6-403P	0.512008	1.66864	1.24529	2.23591	0.000605368
IGF2BP3	0.453521	1.57384	1.17614	2.10602	0.0022759
IL11	0.367274	1.44379	1.08138	1.92768	0.0127578
LINC01705	0.520661	1.68314	1.25698	2.25379	0.000473389
KANK4	0.318382	1.3749	1.01156	1.86875	0.0420127
A2ML1	0.33293	1.39505	1.14179	1.70449	0.00112505
ALPP	0.322357	1.38038	1.10811	1.71955	0.00403114
EPYC	0.202733	1.22475	1.01395	1.47936	0.0354033
MUC16	0.331186	1.39262	1.11115	1.74539	0.00404228
LINC02257	0.709174	2.03231	1.40191	2.94619	0.00018178
EREG	0.509478	1.66442	1.29675	2.13634	6.32483e-05
PADI3	0.287126	1.33259	1.03108	1.72228	0.0282497
AL161431.1	0.394251	1.48327	1.20791	1.82142	0.000168093
IBSP	0.3436	1.41001	1.07309	1.85273	0.0136522
KLK5	0.233661	1.26322	1.02539	1.5562	0.0281227

## Sheet:  Table SV
Table SV. The association of risk score with immune cell subtypes.
immune cell types	coefficients	pvalue
T cell CD4+_TIMER	-0.155852	0.0490704
Myeloid dendritic cell_TIMER	0.180445	0.0224097
T cell CD8+_CIBERSORT	-0.179027	0.0235059
Macrophage M0_CIBERSORT	0.299155	0.000121659
Macrophage M0_CIBERSORT-ABS	0.249644	0.00145471
Macrophage M1_QUANTISEQ	0.32661	2.49653e-05
Macrophage M2_QUANTISEQ	-0.176718	0.0253892
Monocyte_QUANTISEQ	-0.208205	0.00824231
Neutrophil_QUANTISEQ	0.221854	0.00481027
NK cell_QUANTISEQ	-0.335266	1.46646e-05
Myeloid dendritic cell_QUANTISEQ	-0.181078	0.0219346
uncharacterized cell_QUANTISEQ	0.163066	0.0393725
Cancer associated fibroblast_MCPCOUNTER	0.235663	0.00270045
T cell CD4+ naive_XCELL	-0.210712	0.00748378
T cell CD4+ central memory_XCELL	-0.174911	0.0269524
T cell CD8+_XCELL	-0.238387	0.00240031
Class-switched memory B cell_XCELL	-0.252011	0.00130548
Common lymphoid progenitor_XCELL	0.242401	0.00201296
Endothelial cell_XCELL	-0.286095	0.000245001
Granulocyte-monocyte progenitor_XCELL	0.171059	0.0305606
Hematopoietic stem cell_XCELL	-0.175199	0.026698
Macrophage M2_XCELL	-0.179672	0.0230019
Mast cell_XCELL	-0.223805	0.00444223
T cell NK_XCELL	-0.203989	0.00967292
T cell CD4+ Th2_XCELL	0.221753	0.00483003
stroma score_XCELL	-0.166051	0.0358592

## Sheet: Table SVI
Table SVI. The 29 drugs patients with a low risk score are highly susceptible to.
drug	pvalue
ABT.888	6.86e-09
Nutlin.3a	8.04e-09
Nilotinib	5.53e-08
EHT.1864	1.7e-07
PD.173074	1.9e-06
Axitinib	6.72e-06
Metformin	1.17e-05
Lenalidomide	1.36e-05
CCT007093	0.000261271
PD.0332991	0.000362168
ATRA	0.000474678
GDC.0449	0.000626286
BIRB.0796	0.00100036
AZD.2281	0.00187166
Vorinostat	0.00204123
SB590885	0.00260925
AMG.706	0.00639606
MK.2206	0.00683888
AZD8055	0.00974726
VX.702	0.00983656
Temsirolimus	0.00992657
Methotrexate	0.0116742
CEP.701	0.0130971
AG.014699	0.0141678
Camptothecin	0.0192377
SL.0101.1	0.0287742
JNK.9L	0.0378444
Roscovitine	0.0413424
AZD6244	0.0431872

## Sheet: Table SVII
Table SVII. The 54 drugs patients with a high risk score are highly susceptible to.
drug	pvalue
Z.LLNle.CHO	1.5e-07
RDEA119	5.93e-07
A.443654	7.29e-07
A.770041	1.32e-06
Bicalutamide	2.35e-06
FTI.277	6.02e-06
Thapsigargin	8.61e-06
Epothilone.B	9.16e-06
AUY922	1.05e-05
WZ.1.84	3.29e-05
PHA.665752	4.25e-05
Lapatinib	9.51e-05
CHIR.99021	0.000121147
AZD.0530	0.000124423
BI.2536	0.000134755
NSC.87877	0.000166377
CMK	0.000177604
GSK.650394	0.00019705
Pazopanib	0.000199616
JW.7.52.1	0.000204842
Midostaurin	0.000248306
Bleomycin	0.000278365
FH535	0.000441148
BIBW2992	0.000498326
AKT.inhibitor.VIII	0.000730637
Embelin	0.000774873
Docetaxel	0.000802585
Dasatinib	0.000840955
CGP.082996	0.00124199
Paclitaxel	0.00129922
WH.4.023	0.00193369
GNF.2	0.0028085
NVP.TAE684	0.00305296
X17.AAG	0.00390546
AICAR	0.00440701
CGP.60474	0.00477261
Vinorelbine	0.00569571
PF.562271	0.00609548
Bexarotene	0.00639606
MG.132	0.00658263
BMS.509744	0.0107696
GW843682X	0.0133288
Bryostatin.1	0.013564
BMS.536924	0.0193982
S.Trityl.L.cysteine	0.0214137
KIN001.135	0.0219444
Doxorubicin	0.0243741
Rapamycin	0.0283285
VX.680	0.0370087
Cyclopamine	0.0416454
Parthenolide	0.0419501
Imatinib	0.0422567
AP.24534	0.0447749
Gemcitabine	0.045423
